# Supplementary material for: Six new triterpenoids with anti-inflammatory activity from Gypsophila oldhamiana
Source: Royal Society of Chemistry journal article supplement (doi:10.1039/d2nj02906e), 2022-01-01
Supplement: d2nj02906e1.pdf [file d2nj02906e1.pdf]

**SIX NEW TRITERPENOIDS WITH F WITH ANTI-INFLAMMATORY ACTIVITY FROM *GYPSOPHILA*  
*OLDHAMIANA***

Haoyi Sun<sup>a</sup>, Tingting Zhao<sup>a</sup>, Lei Liu<sup>a</sup>, Xiaodong Mou<sup>a</sup>, Jingyong Sun<sup>a,b,c\*</sup>

<sup>a</sup> Institute of Materia Medica, Shandong First Medical University & Shandong Academy of Medical Sciences, Jinan, Shandong, 250117, P. R. China

<sup>b</sup> Key Laboratory for Biotech-Drugs Ministry of Health, Jinan, Shandong, 250117, P. R. China

<sup>c</sup> Key Laboratory for Rare & Uncommon Diseases of Shandong Province, Jinan, Shandong, 250117, P. R. China

\* Corresponding author. e-mail: sunjingyong08@hotmail.com (J.Y. Sun). phone: +86-531-59567209; fax: +86-531-59567077

## Supporting Information

### Contents

|                                                                                                                  |    |
|------------------------------------------------------------------------------------------------------------------|----|
| <b>Chart S1.</b> Chart of extraction and isolation .....                                                         | 4  |
| <b>Table S1.</b> Crystal data and structure refinement for compound 6 .....                                      | 5  |
| <b>Table S2.</b> <i>In vitro</i> inflammatory activity of compounds 1-12 .....                                   | 6  |
| <b>Figure S1.</b> Structures of compounds 7-12 .....                                                             | 6  |
| <b>Figure S2.</b> HPLC spectrum of compound 1 .....                                                              | 7  |
| <b>Figure S3.</b> IR spectrum of compound 1 .....                                                                | 7  |
| <b>Figure S4.</b> HR-ESI-MS spectrum of compound 1 .....                                                         | 8  |
| <b>Figure S5.</b> <sup>1</sup> H-NMR spectrum of compound 1 in C <sub>5</sub> D <sub>5</sub> N (600 MHz) .....   | 8  |
| <b>Figure S6.</b> <sup>13</sup> C-NMR spectrum of compound 1 in C <sub>5</sub> D <sub>5</sub> N (150 MHz) .....  | 9  |
| <b>Figure S7.</b> DEPT spectrum of compound 1 in C <sub>5</sub> D <sub>5</sub> N .....                           | 9  |
| <b>Figure S8.</b> HSQC spectrum of compound 1 in C <sub>5</sub> D <sub>5</sub> N .....                           | 10 |
| <b>Figure S9.</b> HMBC spectrum of compound 1 in C <sub>5</sub> D <sub>5</sub> N .....                           | 10 |
| <b>Figure S10.</b> HPLC spectrum of compound 2 .....                                                             | 11 |
| <b>Figure S11.</b> IR spectrum of compound 2 .....                                                               | 11 |
| <b>Figure S12.</b> HR-ESI-MS spectrum of compound 2 .....                                                        | 12 |
| <b>Figure S13.</b> <sup>1</sup> H-NMR spectrum of compound 2 in C <sub>5</sub> D <sub>5</sub> N (600 MHz) .....  | 12 |
| <b>Figure S14.</b> <sup>13</sup> C-NMR spectrum of compound 2 in C <sub>5</sub> D <sub>5</sub> N (150 MHz) ..... | 13 |
| <b>Figure S15.</b> HSQC spectrum of compound 2 in C <sub>5</sub> D <sub>5</sub> N .....                          | 13 |
| <b>Figure S16.</b> DEPT spectrum of compound 2 in C <sub>5</sub> D <sub>5</sub> N .....                          | 14 |
| <b>Figure S17.</b> HMBC spectrum of compound 2 in C <sub>5</sub> D <sub>5</sub> N .....                          | 15 |
| <b>Figure S18.</b> HPLC spectrum of compound 3 .....                                                             | 15 |
| <b>Figure S19.</b> IR spectrum of compound 3 .....                                                               | 16 |
| <b>Figure S20.</b> HR-ESI-MS spectrum of compound 3 .....                                                        | 16 |
| <b>Figure S21.</b> <sup>1</sup> H-NMR spectrum of compound 3 in C <sub>5</sub> D <sub>5</sub> N (600 MHz) .....  | 17 |

|                                                                                                                          |    |
|--------------------------------------------------------------------------------------------------------------------------|----|
| <b>Figure S22.</b> $^{13}\text{C}$ -NMR spectrum of compound <b>3</b> in $\text{C}_5\text{D}_5\text{N}$ (150 MHz) .....  | 17 |
| <b>Figure S23.</b> DEPT spectrum of compound <b>3</b> in $\text{C}_5\text{D}_5\text{N}$ .....                            | 18 |
| <b>Figure S24.</b> HSQC spectrum of compound <b>3</b> in $\text{C}_5\text{D}_5\text{N}$ .....                            | 18 |
| <b>Figure S25.</b> HMBC spectrum of compound <b>3</b> in $\text{C}_5\text{D}_5\text{N}$ .....                            | 19 |
| <b>Figure S26.</b> HPLC spectrum of compound <b>4</b> .....                                                              | 19 |
| <b>Figure S27.</b> IR spectrum of compound <b>4</b> .....                                                                | 20 |
| <b>Figure S28.</b> HR-ESI-MS spectrum of compound <b>4</b> .....                                                         | 20 |
| <b>Figure S29.</b> $^1\text{H}$ -NMR spectrum of compound <b>4</b> in $\text{C}_5\text{D}_5\text{N}$ (600 MHz) .....     | 21 |
| <b>Figure S30.</b> $^{13}\text{C}$ -NMR spectrum of compound <b>4</b> in $\text{C}_5\text{D}_5\text{N}$ (150 MHz) .....  | 21 |
| <b>Figure S31.</b> DEPT spectrum of compound <b>4</b> in $\text{C}_5\text{D}_5\text{N}$ .....                            | 22 |
| <b>Figure S32.</b> HSQC spectrum of compound <b>4</b> in $\text{C}_5\text{D}_5\text{N}$ .....                            | 23 |
| <b>Figure S33.</b> HMBC spectrum of compound <b>4</b> in $\text{C}_5\text{D}_5\text{N}$ .....                            | 23 |
| <b>Figure S34.</b> HPLC spectrum of compound <b>5</b> .....                                                              | 24 |
| <b>Figure S35.</b> IR spectrum of compound <b>5</b> .....                                                                | 24 |
| <b>Figure S36.</b> HR-ESI-MS spectrum of compound <b>5</b> .....                                                         | 25 |
| <b>Figure S37.</b> $^1\text{H}$ -NMR spectrum of compound <b>5</b> in $\text{C}_5\text{D}_5\text{N}$ (600 MHz) .....     | 25 |
| <b>Figure S38.</b> $^{13}\text{C}$ -NMR spectrum of compound <b>5</b> in $\text{C}_5\text{D}_5\text{N}$ (150 MHz) .....  | 26 |
| <b>Figure S39.</b> HSQC spectrum of compound <b>5</b> in $\text{C}_5\text{D}_5\text{N}$ .....                            | 26 |
| <b>Figure S40.</b> HMBC spectrum of compound <b>5</b> in $\text{C}_5\text{D}_5\text{N}$ .....                            | 27 |
| <b>Figure S41.</b> HPLC spectrum of compound <b>6</b> .....                                                              | 27 |
| <b>Figure S42.</b> IR spectrum of compound <b>6</b> .....                                                                | 28 |
| <b>Figure S43.</b> HR-ESI-MS spectrum of compound <b>6</b> .....                                                         | 28 |
| <b>Figure S44.</b> $^1\text{H}$ -NMR spectrum of compound <b>6</b> in $\text{C}_5\text{D}_5\text{N}$ (600 MHz) .....     | 29 |
| <b>Figure S45.</b> $^{13}\text{C}$ -NMR spectrum of compound <b>6</b> in $\text{C}_5\text{D}_5\text{N}$ (150 MHz) .....  | 29 |
| <b>Figure S46.</b> DEPT spectrum of compound <b>6</b> in $\text{C}_5\text{D}_5\text{N}$ .....                            | 30 |
| <b>Figure S47.</b> HSQC spectrum of compound <b>6</b> in $\text{C}_5\text{D}_5\text{N}$ .....                            | 30 |
| <b>Figure S48.</b> HMBC spectrum of compound <b>6</b> in $\text{C}_5\text{D}_5\text{N}$ .....                            | 31 |
| <b>Figure S49.</b> NOESY spectrum of compound <b>6</b> in $\text{C}_5\text{D}_5\text{N}$ .....                           | 31 |
| <b>Figure S50.</b> HPLC spectrum of compound <b>7</b> .....                                                              | 32 |
| <b>Figure S51.</b> $^1\text{H}$ -NMR spectrum of compound <b>7</b> in $\text{C}_5\text{D}_5\text{N}$ (600 MHz) .....     | 32 |
| <b>Figure S52.</b> $^{13}\text{C}$ -NMR spectrum of compound <b>7</b> in $\text{C}_5\text{D}_5\text{N}$ (150 MHz) .....  | 33 |
| <b>Figure S53.</b> HPLC spectrum of compound <b>8</b> .....                                                              | 33 |
| <b>Figure S54.</b> $^1\text{H}$ -NMR spectrum of compound <b>8</b> in $\text{C}_5\text{D}_5\text{N}$ (600 MHz) .....     | 34 |
| <b>Figure S55.</b> $^{13}\text{C}$ -NMR spectrum of compound <b>8</b> in $\text{C}_5\text{D}_5\text{N}$ (150 MHz) .....  | 34 |
| <b>Figure S56.</b> HPLC spectrum of compound <b>9</b> .....                                                              | 35 |
| <b>Figure S57.</b> $^1\text{H}$ -NMR spectrum of compound <b>9</b> in $\text{C}_5\text{D}_5\text{N}$ (600 MHz) .....     | 35 |
| <b>Figure S58.</b> $^{13}\text{C}$ -NMR spectrum of compound <b>9</b> in $\text{C}_5\text{D}_5\text{N}$ (150 MHz) .....  | 36 |
| <b>Figure S59.</b> HPLC spectrum of compound <b>10</b> .....                                                             | 36 |
| <b>Figure S60.</b> $^1\text{H}$ -NMR spectrum of compound <b>10</b> in $\text{C}_5\text{D}_5\text{N}$ (600 MHz) .....    | 37 |
| <b>Figure S61.</b> $^{13}\text{C}$ -NMR spectrum of compound <b>10</b> in $\text{C}_5\text{D}_5\text{N}$ (150 MHz) ..... | 37 |
| <b>Figure S62.</b> HPLC spectrum of compound <b>11</b> .....                                                             | 38 |
| <b>Figure S63.</b> $^1\text{H}$ -NMR spectrum of compound <b>11</b> in $\text{C}_5\text{D}_5\text{N}$ (600 MHz) .....    | 38 |
| <b>Figure S64.</b> $^{13}\text{C}$ -NMR spectrum of compound <b>11</b> in $\text{C}_5\text{D}_5\text{N}$ (150 MHz) ..... | 39 |

|                                                                                                                          |    |
|--------------------------------------------------------------------------------------------------------------------------|----|
| <b>Figure S65.</b> HPLC spectrum of compound <b>12</b> .....                                                             | 39 |
| <b>Figure S66.</b> $^1\text{H}$ -NMR spectrum of compound <b>12</b> in $\text{C}_5\text{D}_5\text{N}$ (600 MHz) .....    | 40 |
| <b>Figure S67.</b> $^{13}\text{C}$ -NMR spectrum of compound <b>12</b> in $\text{C}_5\text{D}_5\text{N}$ (150 MHz) ..... | 40 |

Chart S1. Chart of extraction and isolation

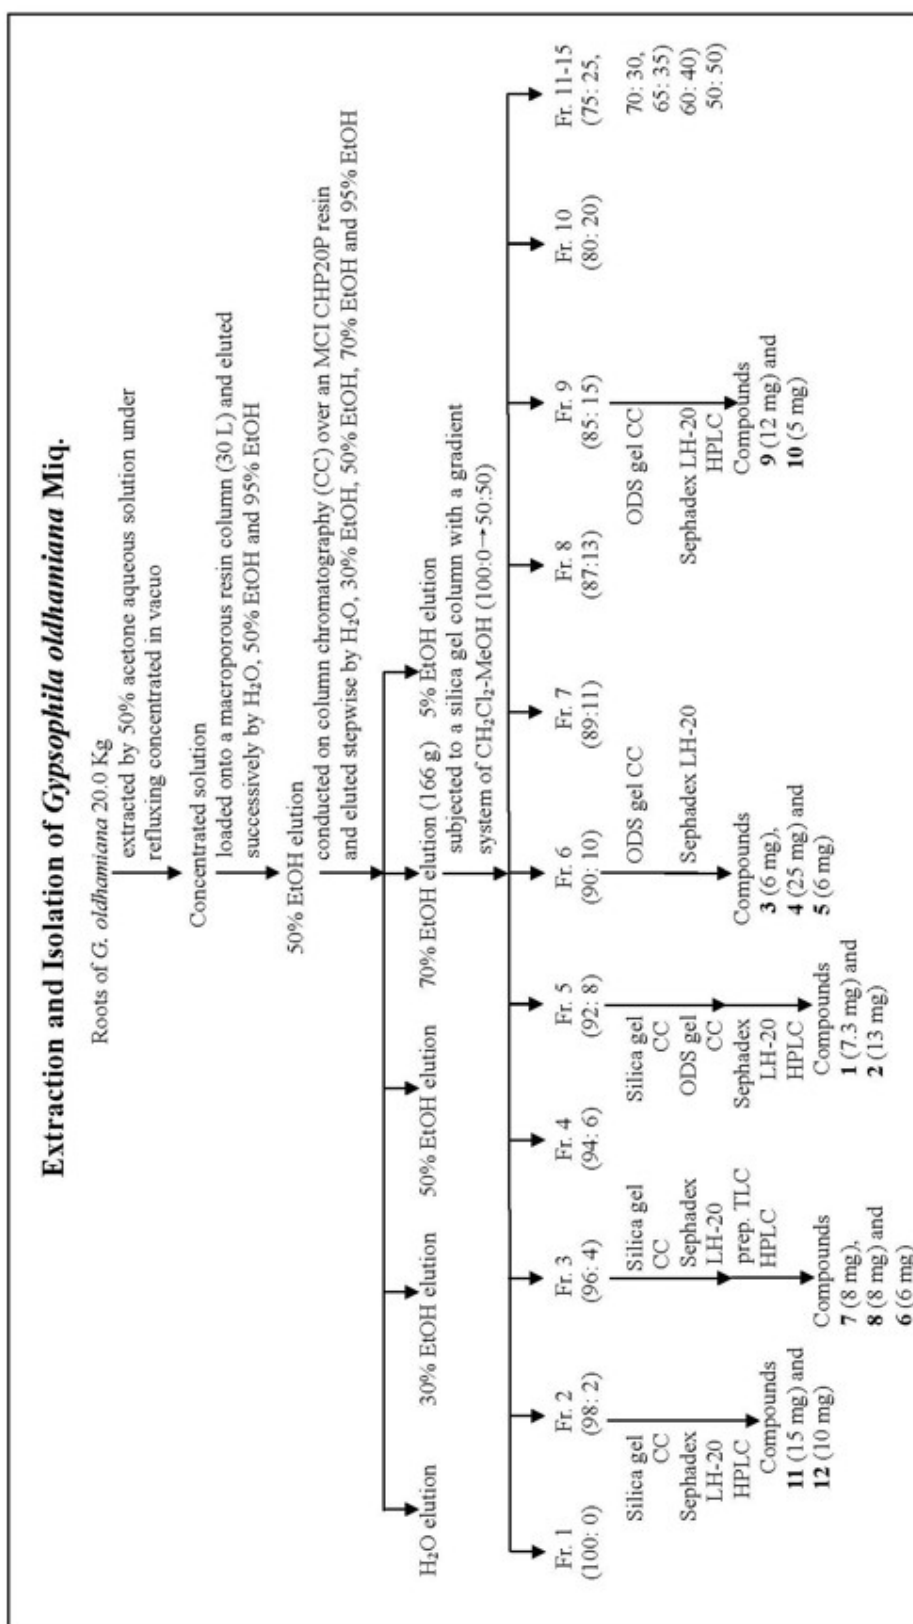

**Table S1.** Crystal data and structure refinement for compound **6**.

|                                   |                                                |          |
|-----------------------------------|------------------------------------------------|----------|
| Identification code               | cu_2019112001 (CCDC number: 2169252)           |          |
| Empirical formula                 | C <sub>30</sub> H <sub>46</sub> O <sub>4</sub> |          |
| Formula weight                    | 470.67                                         |          |
| Temperature                       | 296(2) K                                       |          |
| Wavelength                        | 1.54178 Å                                      |          |
| Crystal system                    | Monoclinic                                     |          |
| Space group                       | P 21                                           |          |
| Unit cell dimensions              | a = 7.4419(7) Å                                | ∠ = 90°. |
|                                   | b = 11.3693(11) Å                              | ∠ = 94°. |
|                                   | c = 14.9985(14) Å                              | ∠ = 90°. |
| Volume                            | 1266.6(2) Å <sup>3</sup>                       |          |
| Z                                 | 2                                              |          |
| Density (calculated)              | 1.234 Mg/m <sup>3</sup>                        |          |
| Absorption coefficient            | 0.623 mm <sup>-1</sup>                         |          |
| F(000)                            | 516                                            |          |
| Theta range for data collection   | 4.9 to 66.6°.                                  |          |
| Index ranges                      | -8<=h<=8, -13<=k<=13, -16<=l<=17               |          |
| Reflections collected             | 9188                                           |          |
| Independent reflections           | 4042 [R(int) = 0.199]                          |          |
| Completeness to theta = 66.59°    | 96.1 %                                         |          |
| Absorption correction             | multi-scan                                     |          |
| Max. and min. transmission        | 0.836 and 0.780                                |          |
| Refinement method                 | Refinement on F <sup>2</sup>                   |          |
| Data / restraints / parameters    | 4042 / 1 / 315                                 |          |
| Goodness-of-fit on F <sup>2</sup> | 1.002                                          |          |
| Final R indices [I>2sigma(I)]     | R1 = 0.1099, wR2 = 0.2523                      |          |
| R indices (all data)              | R1 = 0.1795, wR2 = 0.3047                      |          |
| Absolute structure parameter      | -0.9(6)                                        |          |
| Largest diff. peak and hole       | 0.45 and -0.65 e.Å <sup>-3</sup>               |          |

**Table S2** *In vitro* inflammatory activity of compounds **1-12**.

| compound                   | IC <sub>50</sub> <sup>a</sup> (μM) | compound | IC <sub>50</sub> <sup>a</sup> (μM) |
|----------------------------|------------------------------------|----------|------------------------------------|
|                            | RAW264.7                           |          | RAW264.7                           |
| 1                          | 29.31±0.86 μM                      | 7        | 8.61±0.32 μM                       |
| 2                          | 2.55±0.49 μM                       | 8        | 5.51±0.63 μM                       |
| 3                          | 0.93±0.21 μM                       | 9        | 11.26±0.58 μM                      |
| 4                          | 37.61±0.74 μM                      | 10       | 21.47±0.54 μM                      |
| 5                          | 29.35±0.67 μM                      | 11       | 1.71±0.35 μM                       |
| 6                          | 18.73±0.68 μM                      | 12       | 46.3±0.81 μM                       |
| Dexamethasone <sup>b</sup> | 0.86 ±0.08 μM                      |          |                                    |

<sup>a</sup> Means ± S.D. From three independent experiments (n=3)

<sup>b</sup> Positive control

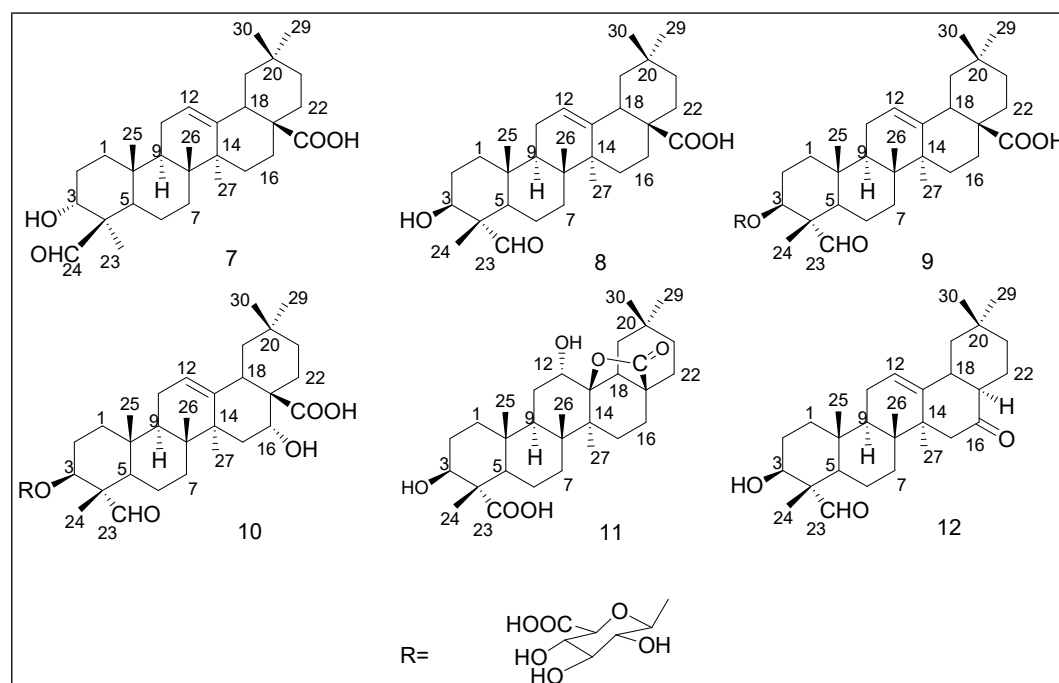

**Figure S1.** Structures of compounds **7-12**

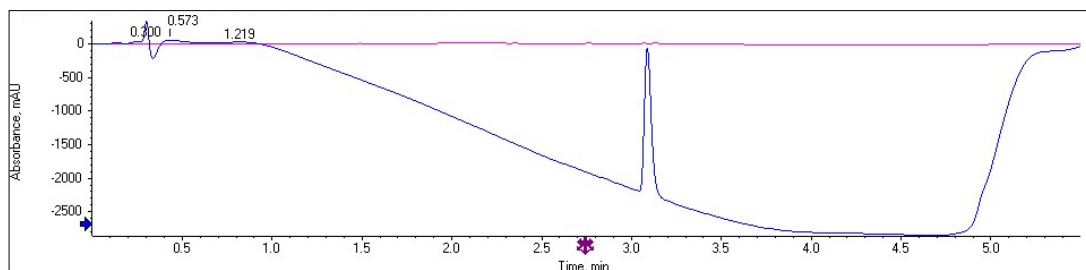

**Figure S2.** HPLC spectrum of compound **1**

The sample was separated on InertSustain® C18 column with water (A)- acetonitrile (B) as the mobile phase for gradient elution. The analysis was performed at a flowrate of 0.8 mL/min, column temperature of 45°C and the detection wavelength was set at 210 nm and 254nm.

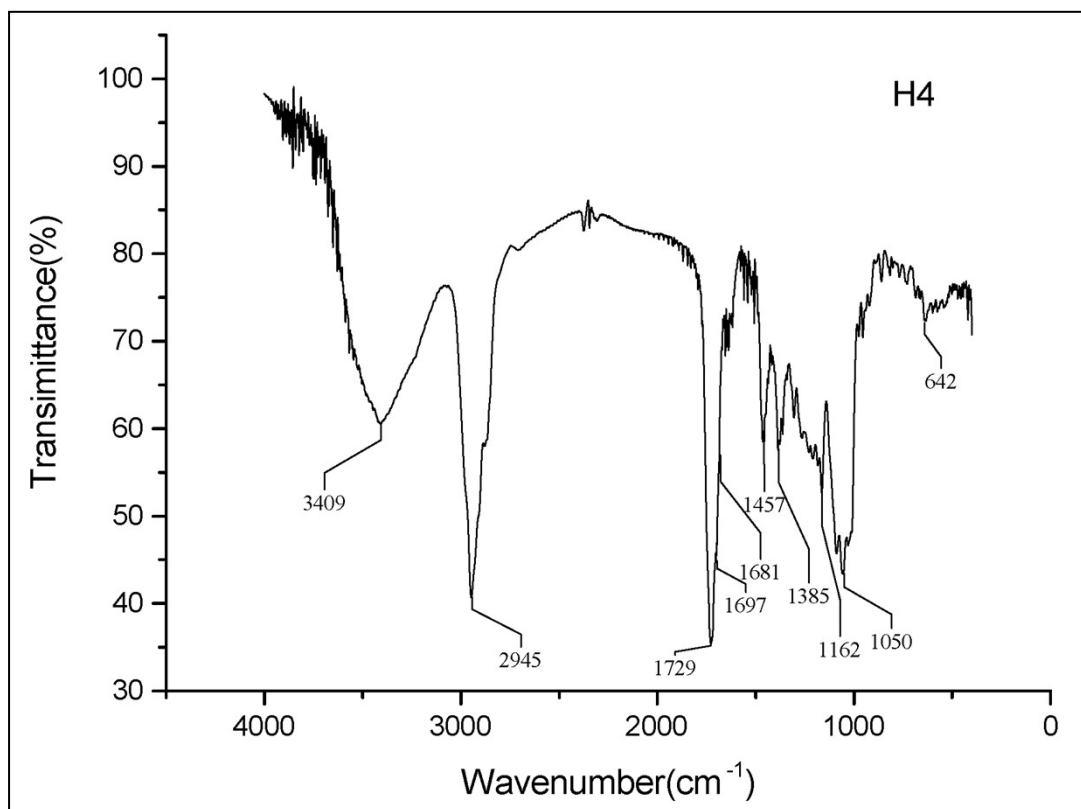

**Figure S3.** IR spectrum of compound **1**

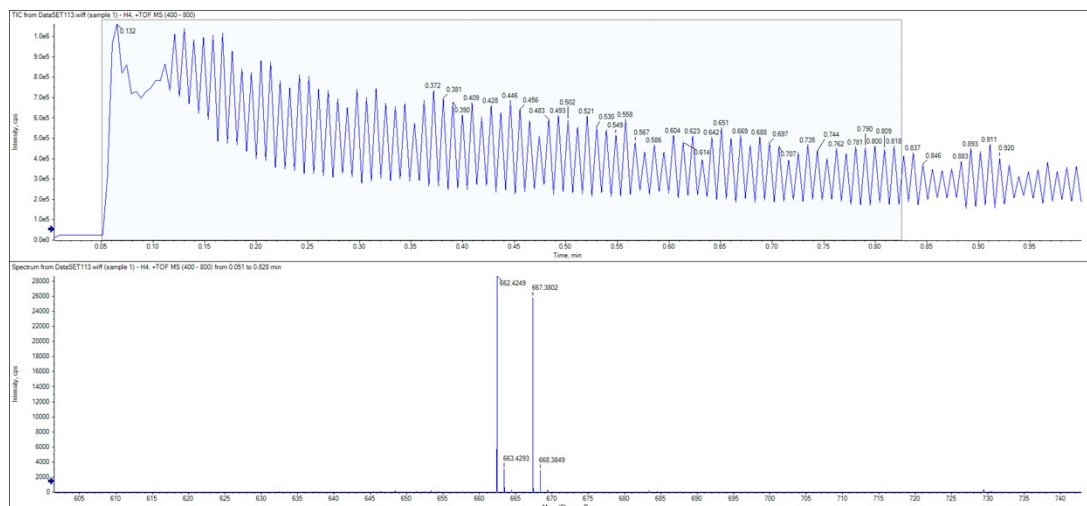

**Figure S4.** HR-ESI-MS spectrum of compound **1**

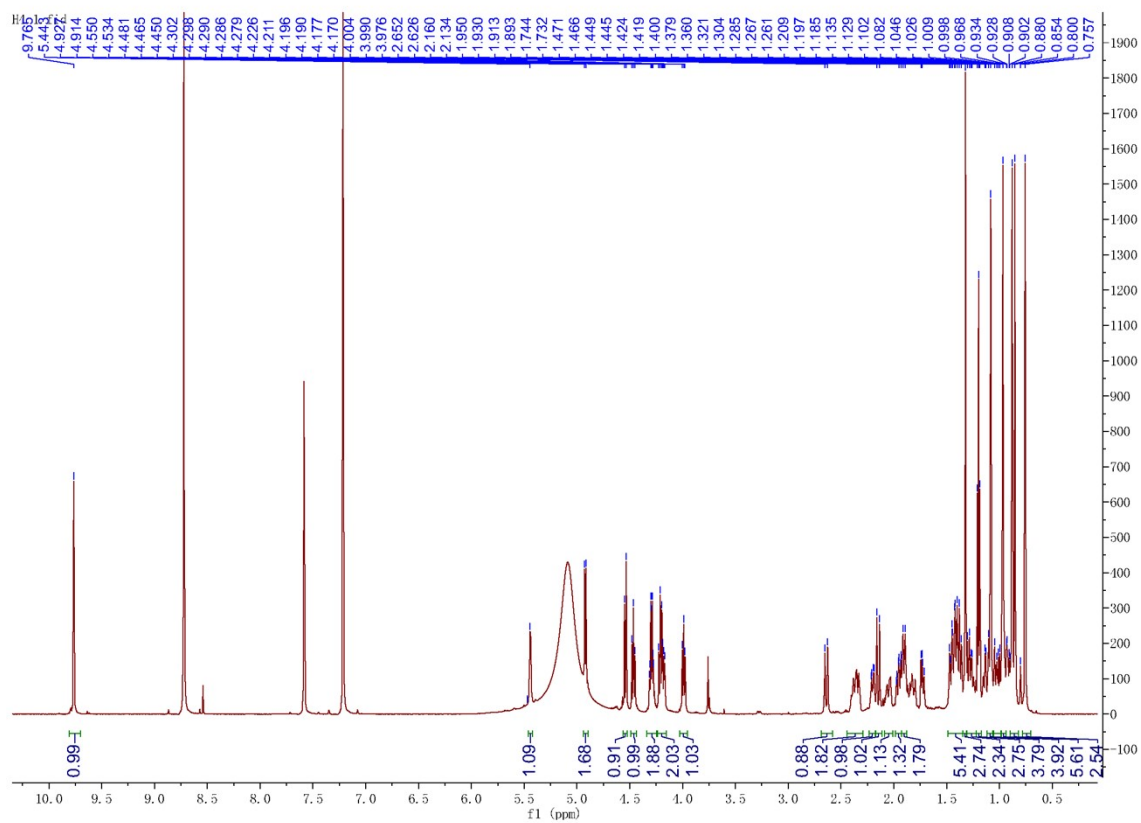

**Figure S5.** <sup>1</sup>H-NMR spectrum of compound **1** in C<sub>5</sub>D<sub>5</sub>N (600 MHz)



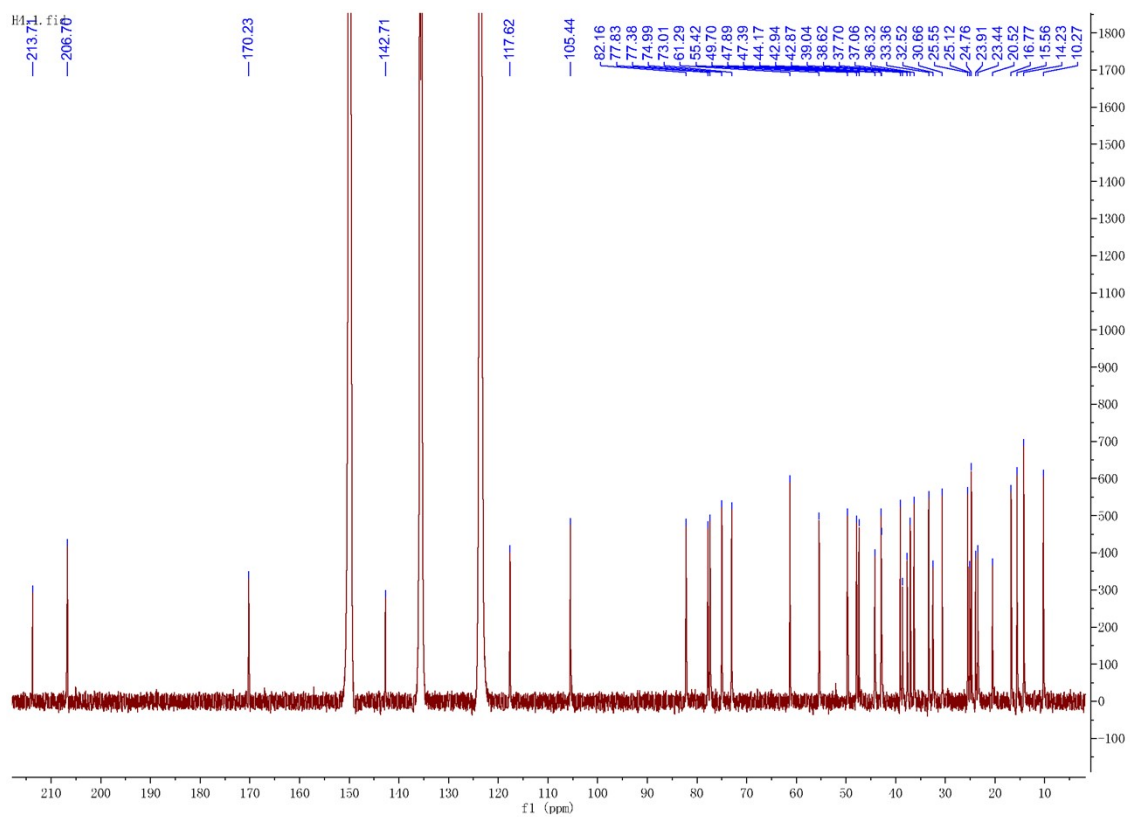

Figure S6.  $^{13}\text{C}$ -NMR spectrum of compound **1** in  $\text{C}_5\text{D}_5\text{N}$  (150 MHz)

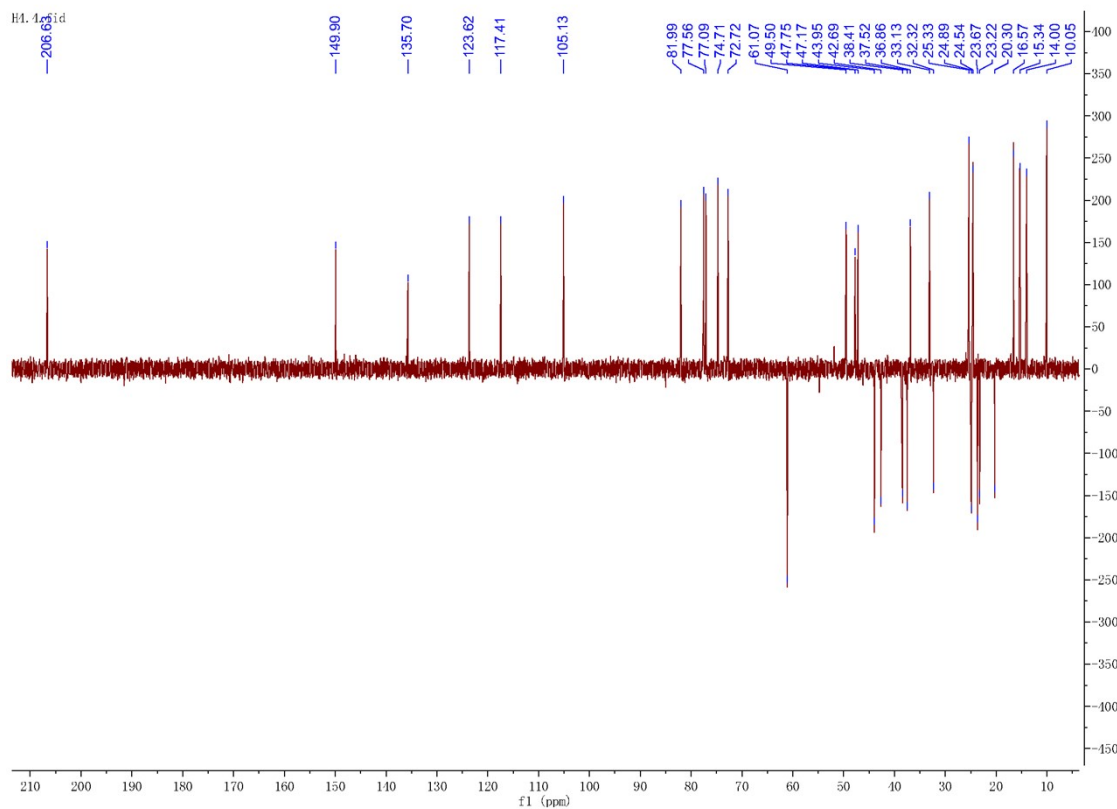

Figure S7. DEPT spectrum of compound **1** in  $\text{C}_5\text{D}_5\text{N}$

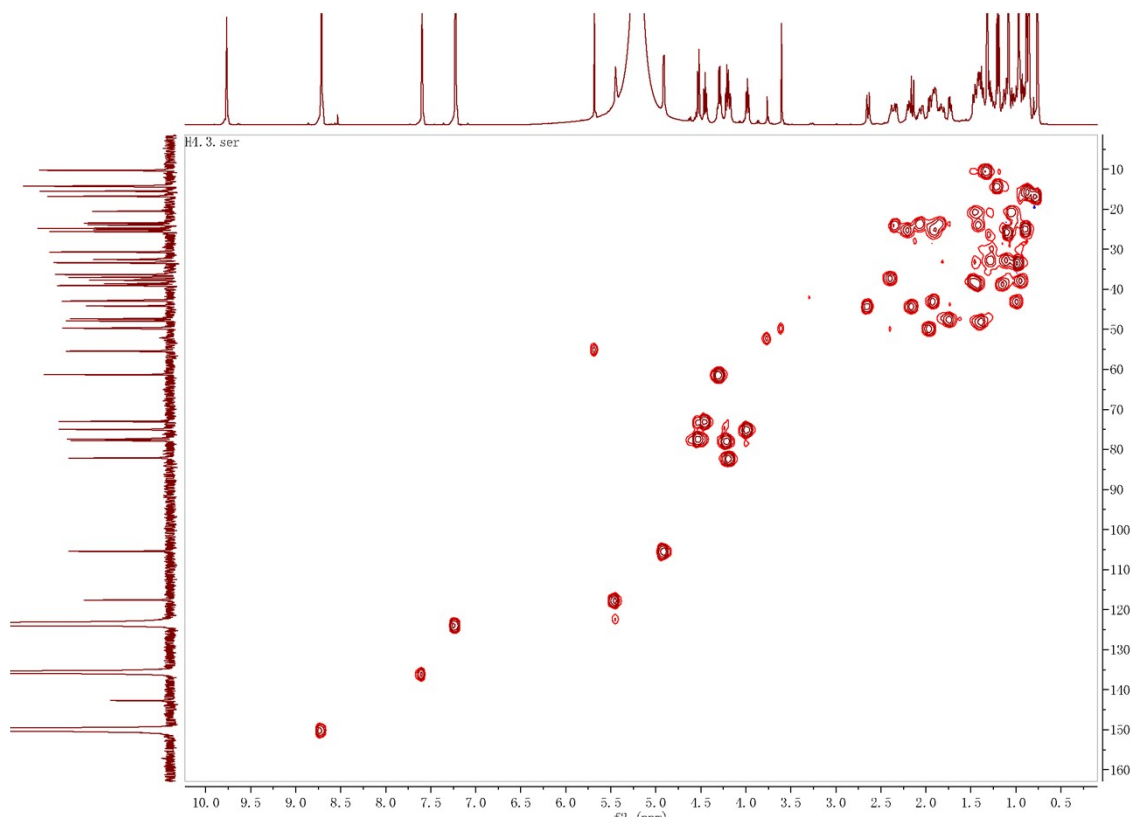

**Figure S8.** HSQC spectrum of compound **1** in  $C_5D_5N$

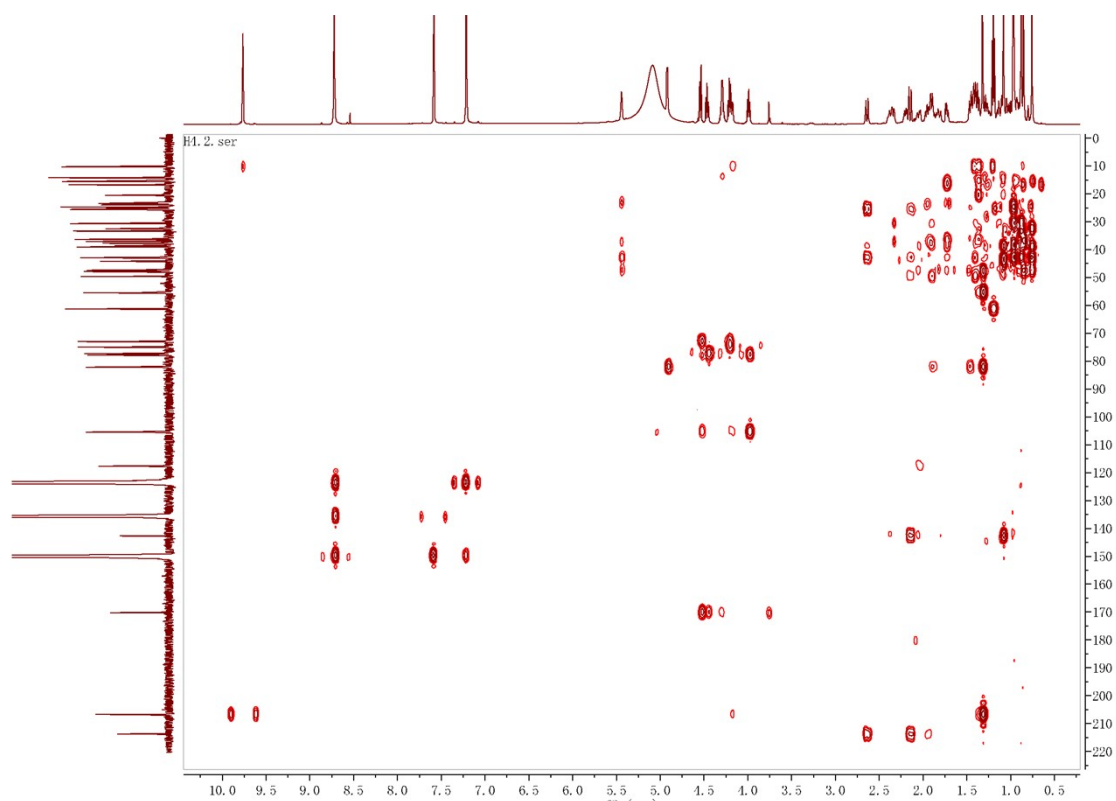

**Figure S9.** HMBC spectrum of compound **1** in  $C_5D_5N$

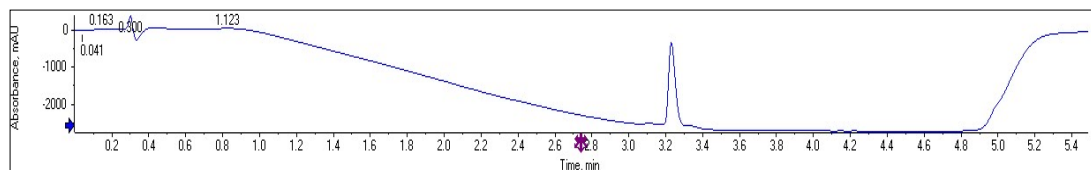

**Figure S10.** HPLC spectrum of compound **2**

The sample was separated on InertSustain® C18 column with water (A)- acetonitrile (B) as the mobile phase for gradient elution. The analysis was performed at a flowrate of 0.8 mL/min, column temperature of 45°C and the detection wavelength was set at 210 nm.

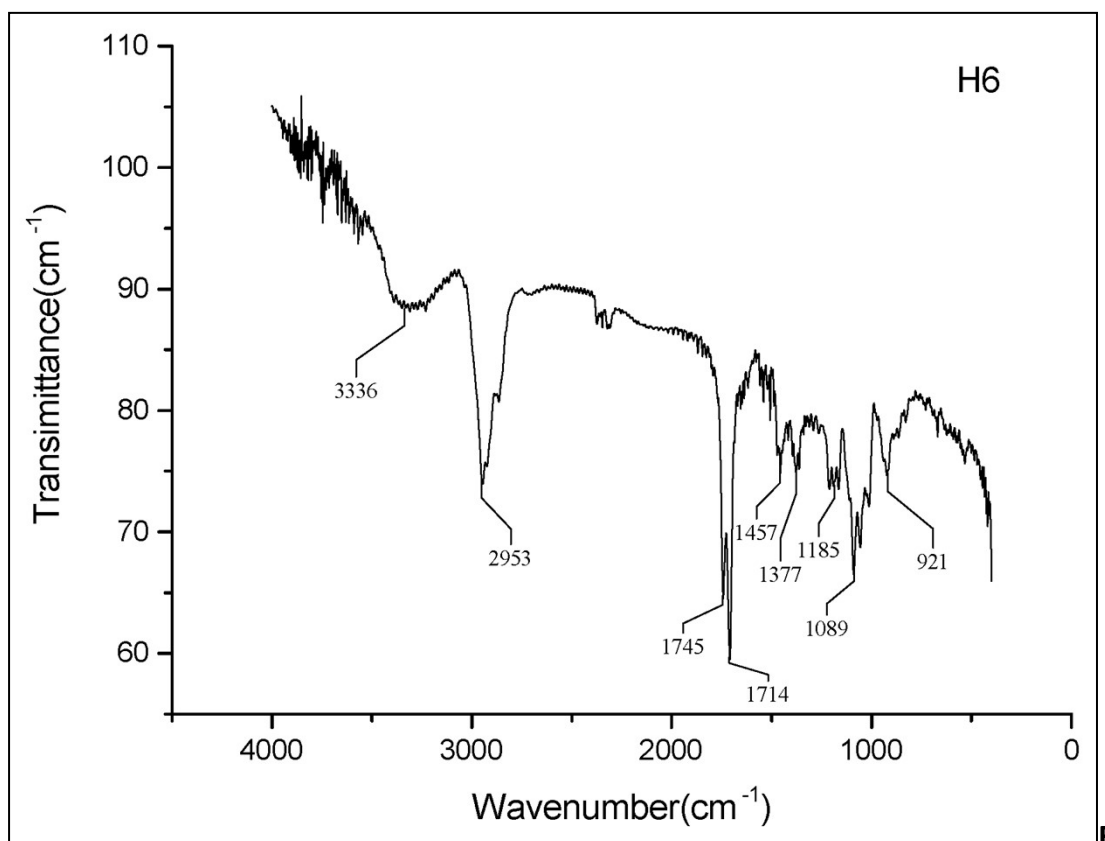

**Figure S11.** IR spectrum of compound **2**

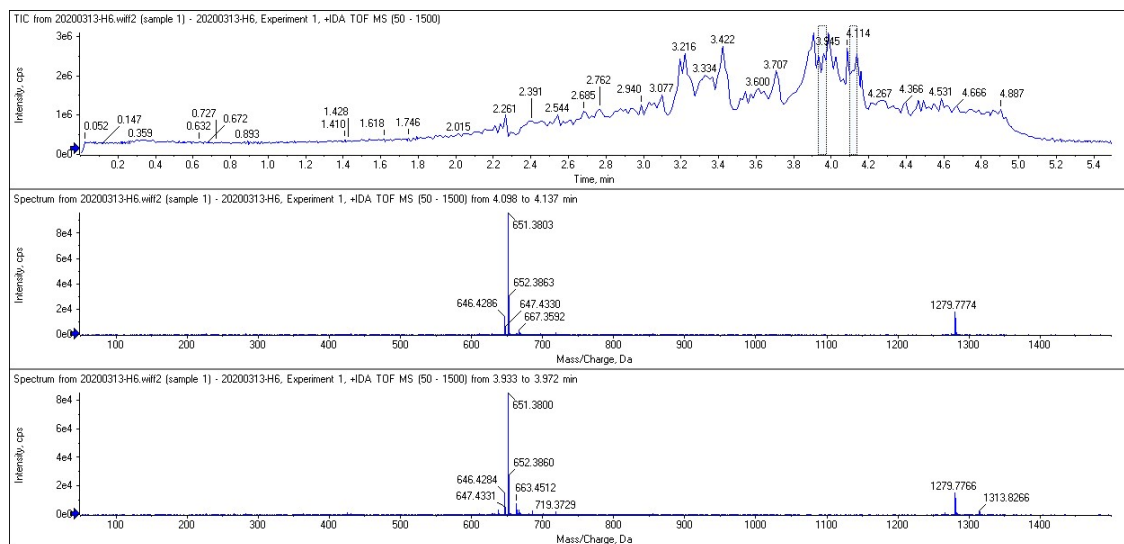

**Figure S12.** HR-ESI-MS spectrum of compound **2**

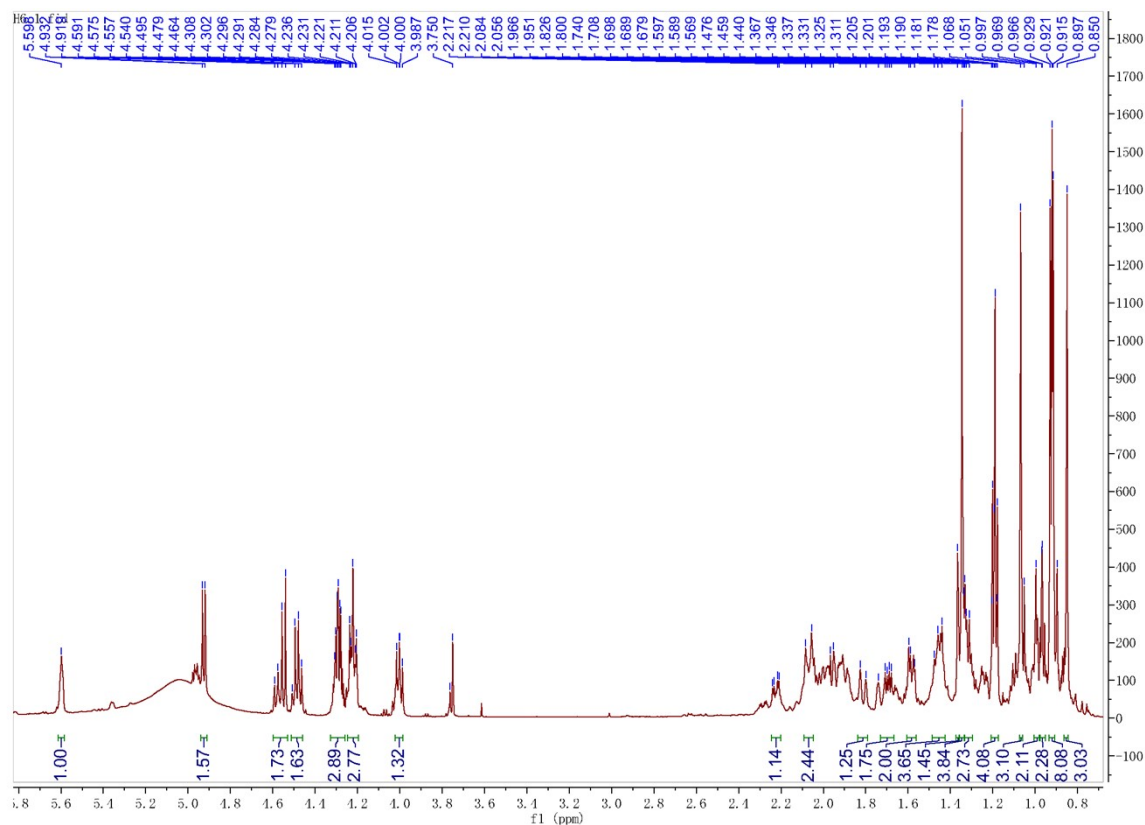

**Figure S13.**  $^1\text{H-NMR}$  spectrum of compound **2** in  $\text{C}_5\text{D}_5\text{N}$  (600 MHz)

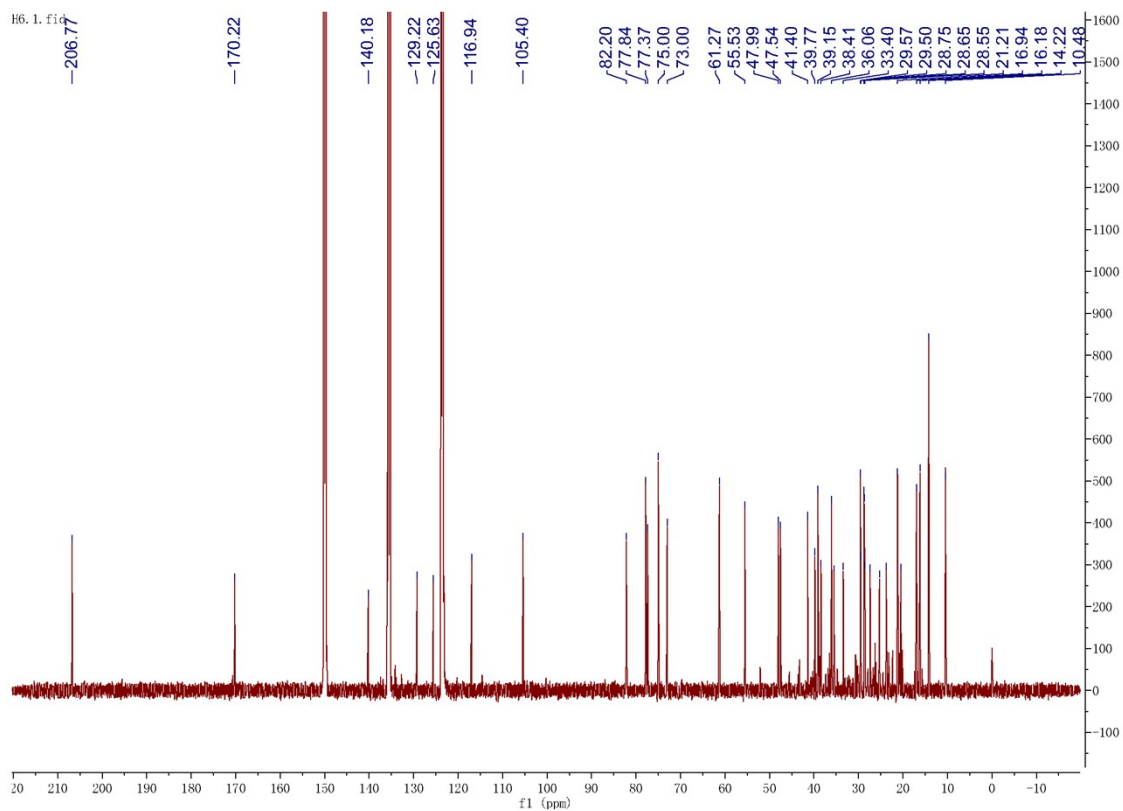

Figure S14.  $^{13}\text{C}$ -NMR spectrum of compound **2** in  $\text{C}_5\text{D}_5\text{N}$  (150 MHz)

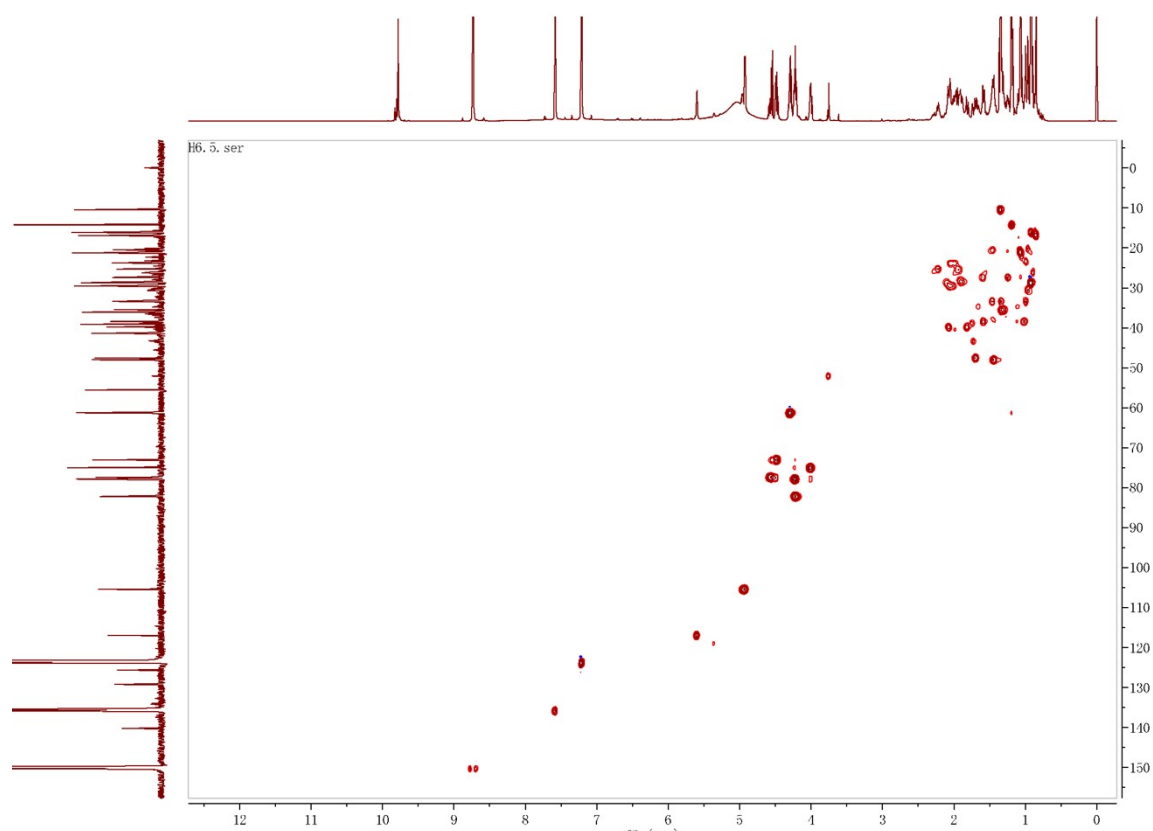

Figure S15. HSQC spectrum of compound **2** in  $\text{C}_5\text{D}_5\text{N}$

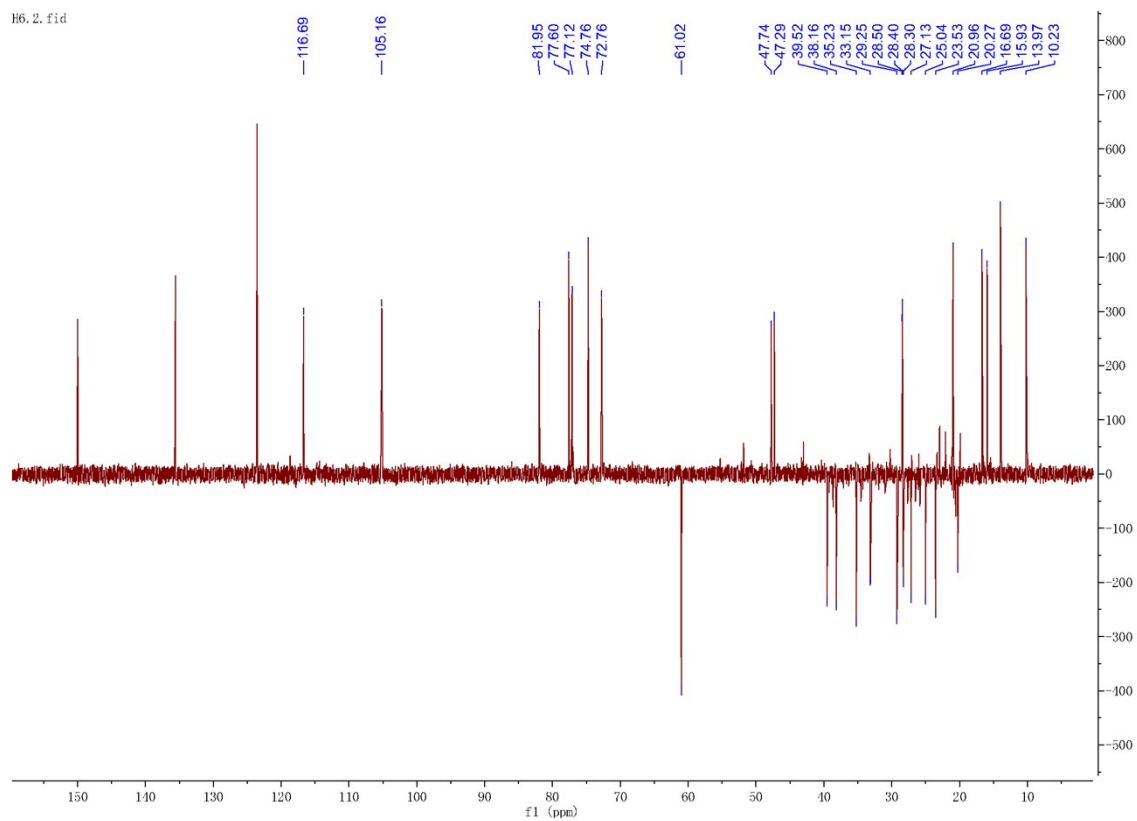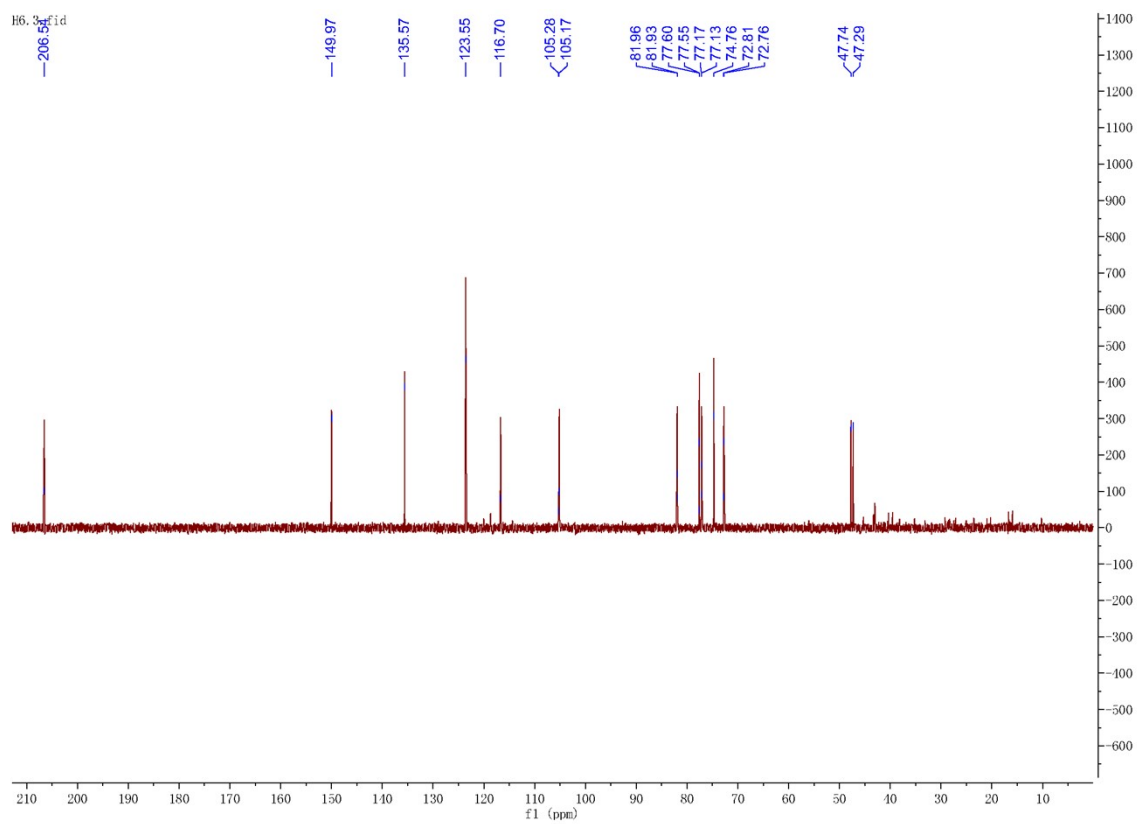

Figure S16. DEPT spectrum of compound 2 in  $C_5D_5N$

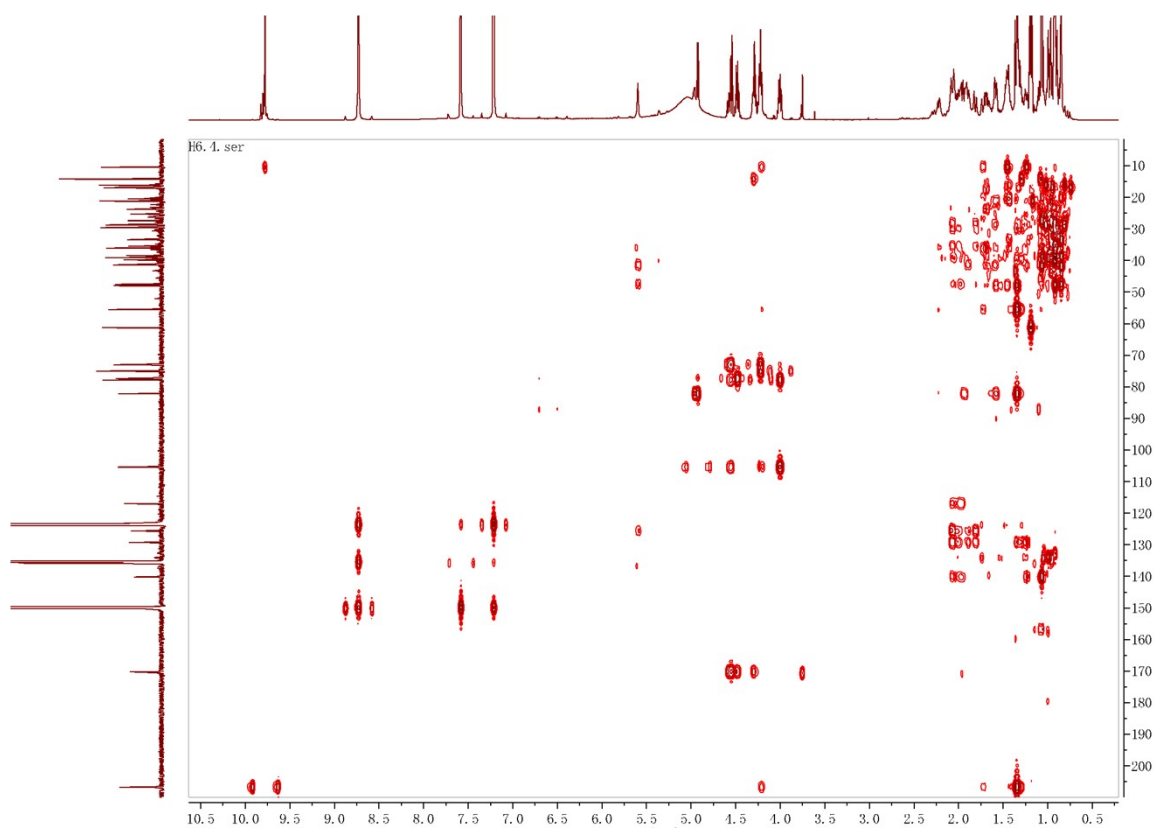

**Figure S17.** HMBC spectrum of compound **2** in  $C_5D_5N$

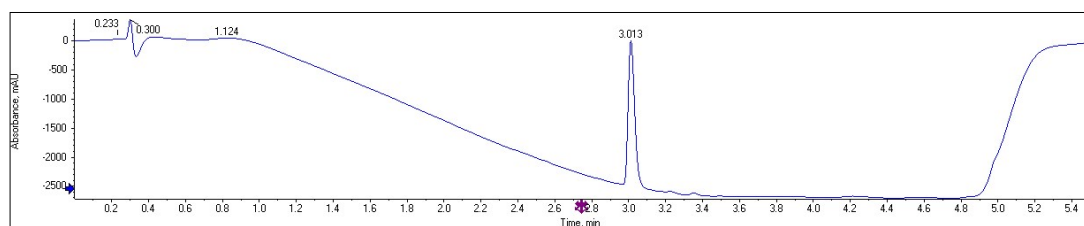

**Figure S18.** HPLC spectrum of compound **3**

The sample was separated on InertSustain® C18 column with water (A)- acetonitrile (B) as the mobile phase for gradient elution. The analysis was performed at a flowrate of 0.8 mL/min, column temperature of 45°C and the detection wavelength was set at 210 nm.

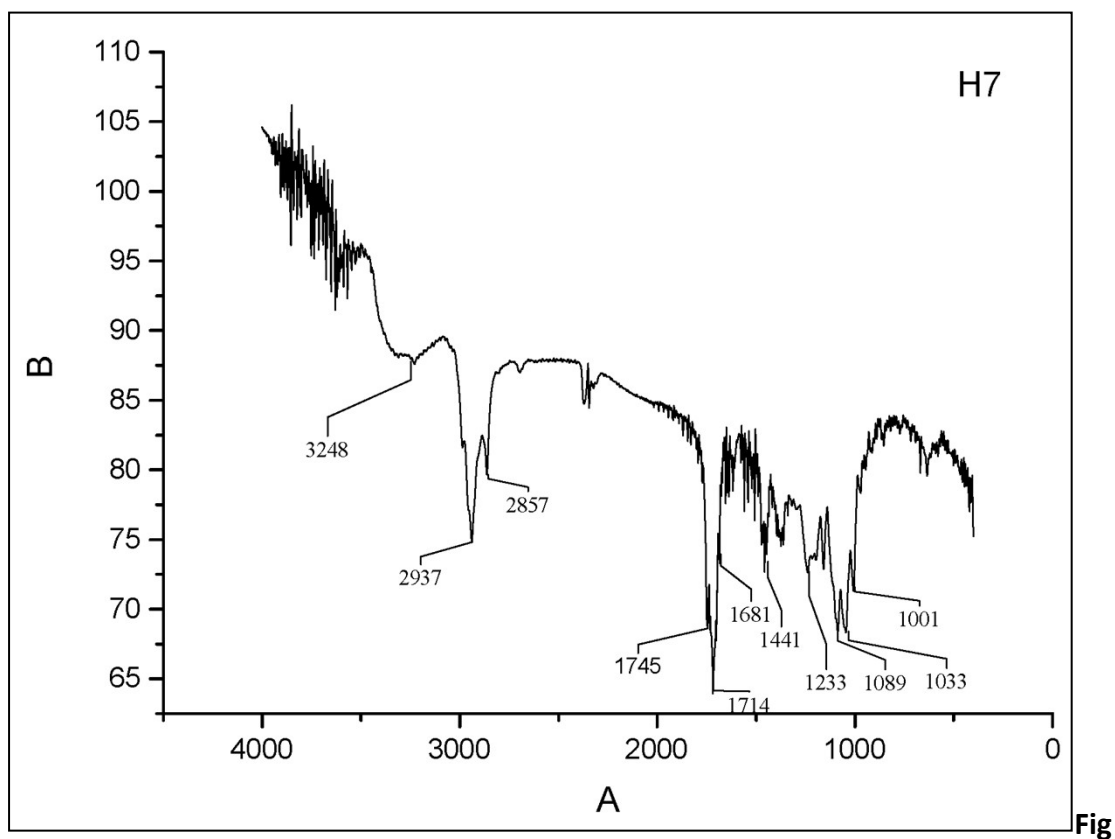

**Figure S19.** IR spectrum of compound **3**

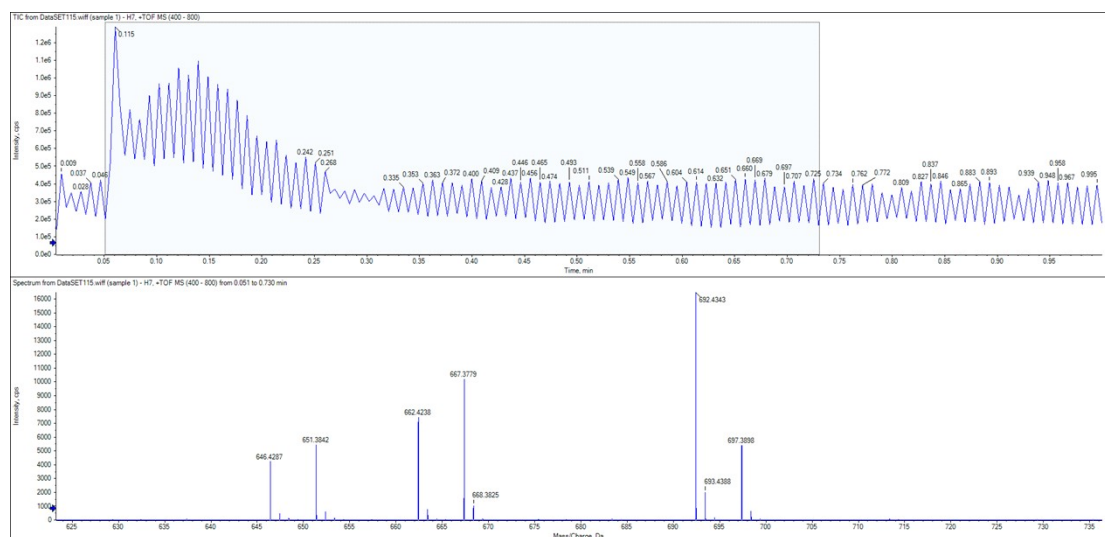

**Figure S20.** HR-ESI-MS spectrum of compound **3**



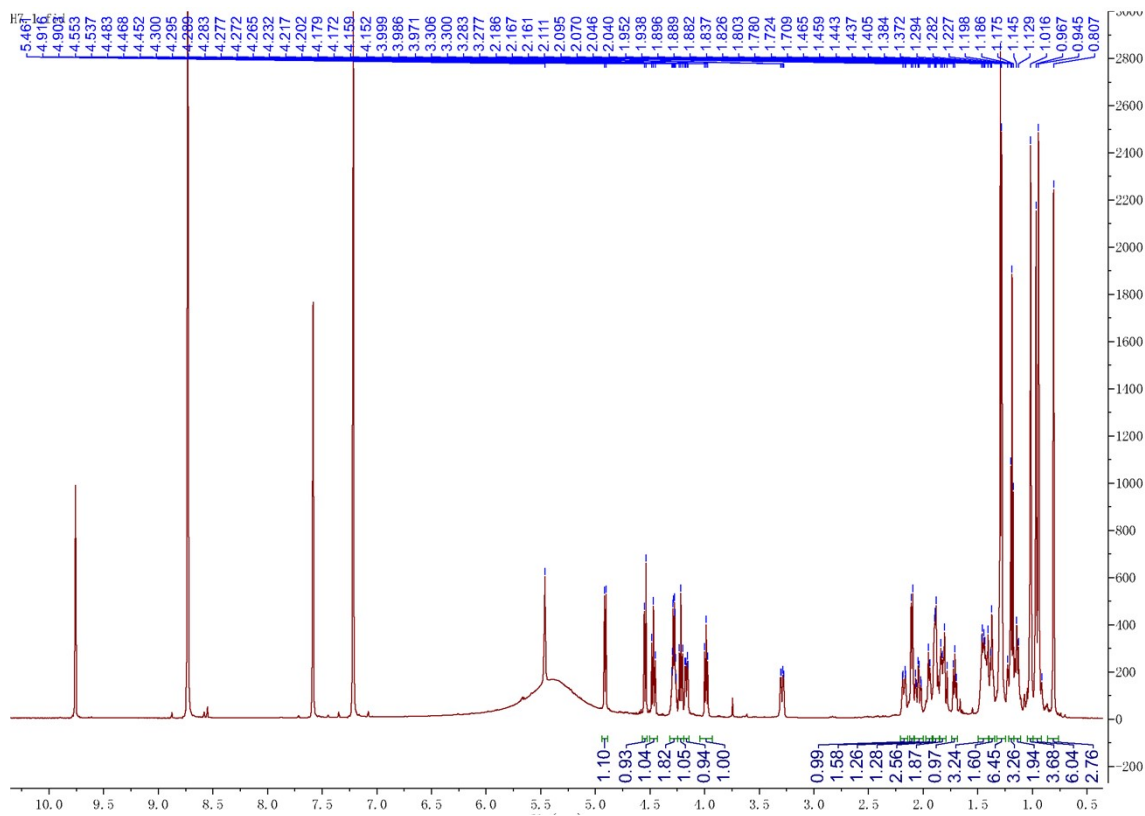

Figure S21.  $^1\text{H}$ -NMR spectrum of compound **3** in  $\text{C}_5\text{D}_5\text{N}$  (600 MHz)

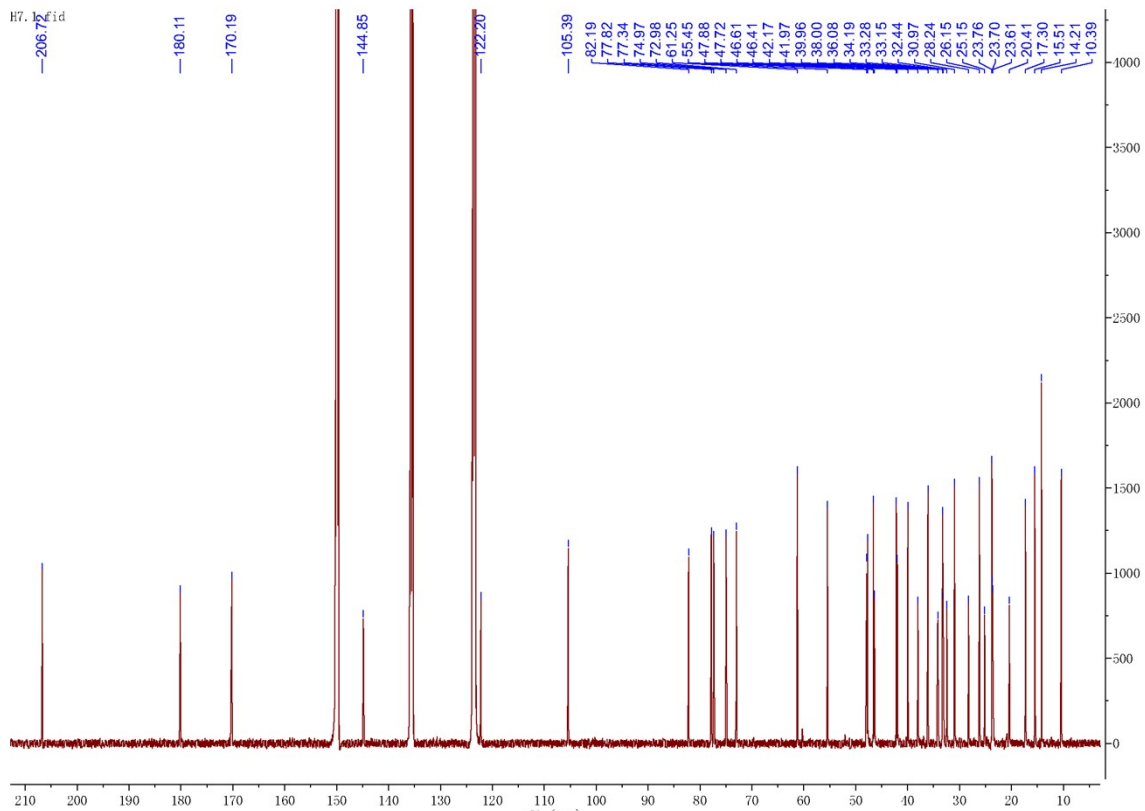

Figure S22.  $^{13}\text{C}$ -NMR spectrum of compound **3** in  $\text{C}_5\text{D}_5\text{N}$  (150 MHz)

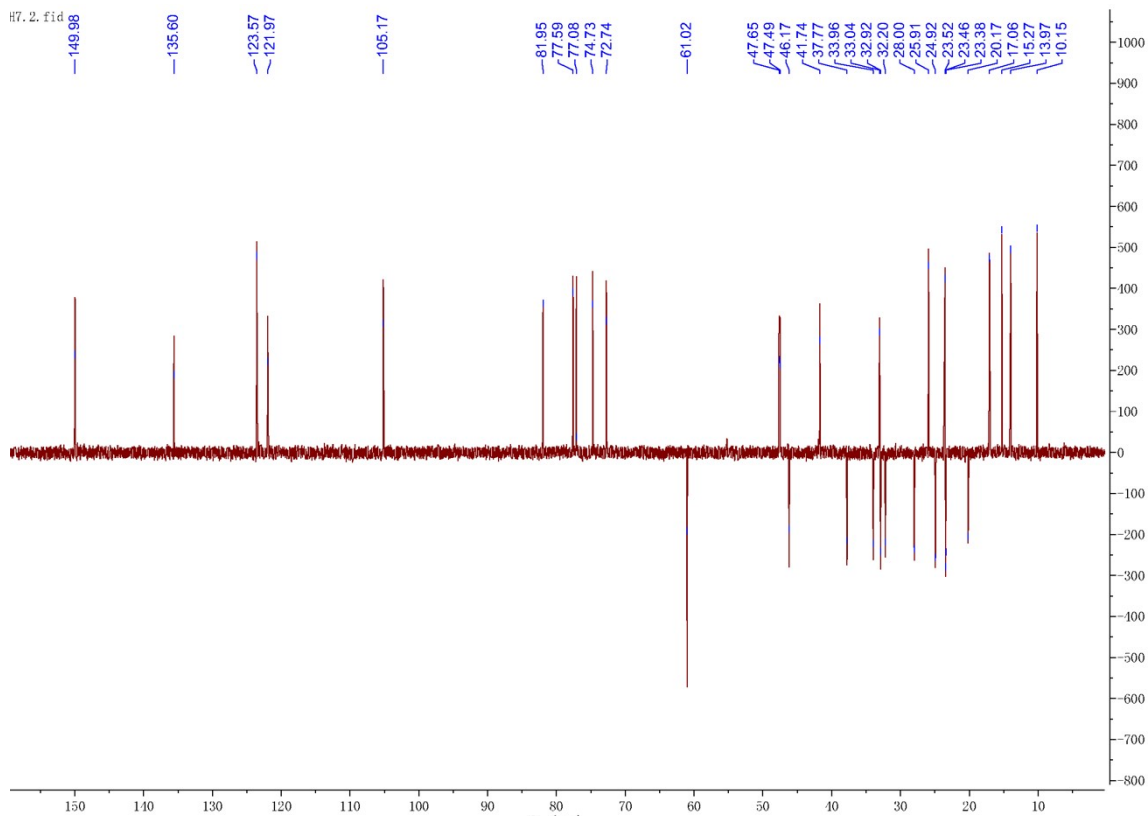

Figure S23. DEPT spectrum of compound **3** in  $C_5D_5N$

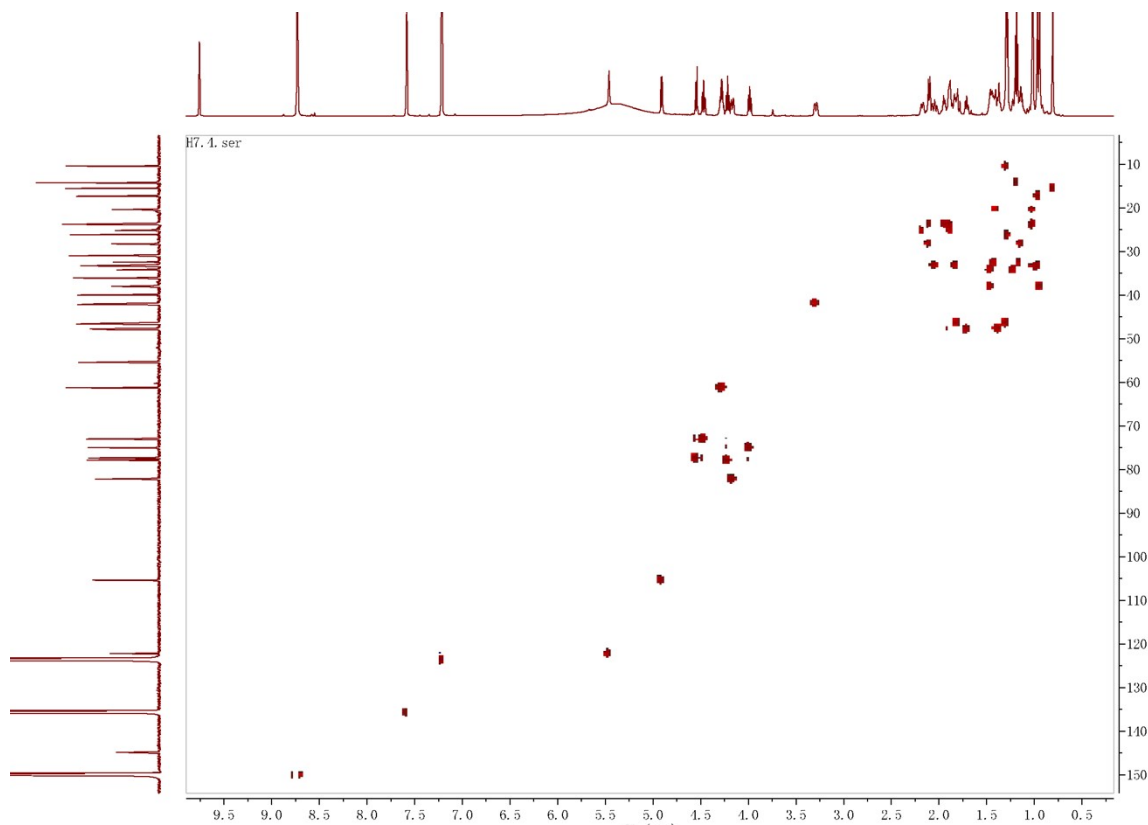

Figure S24. HSQC spectrum of compound **3** in  $C_5D_5N$

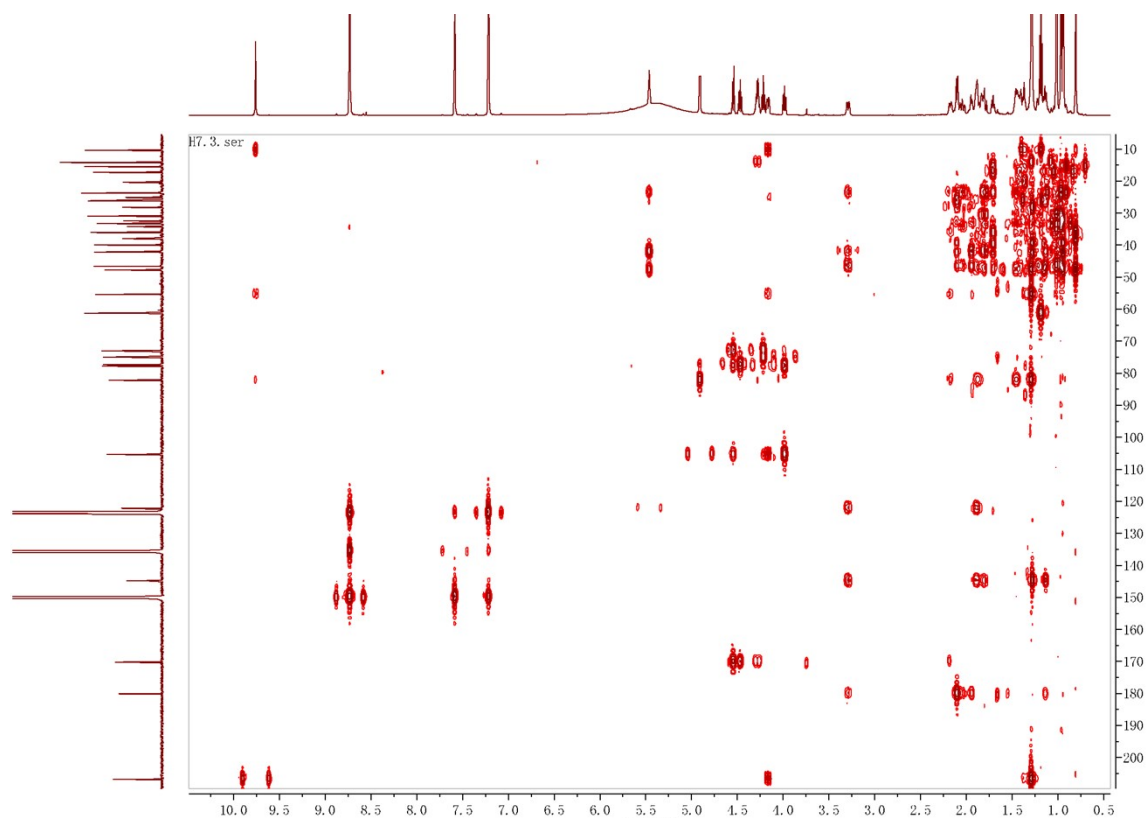

**Figure S25.** HMBC spectrum of compound **3** in  $C_5D_5N$

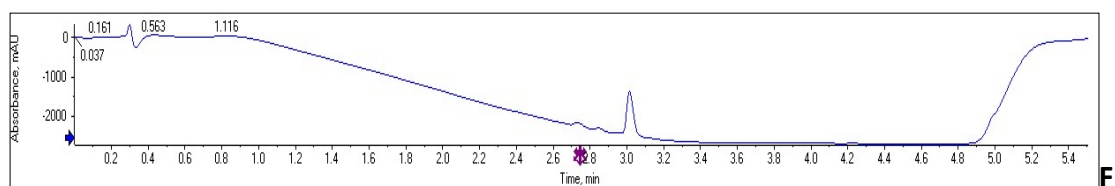

**Figure S26.** HPLC spectrum of compound **4**

The sample was separated on InertSustain® C18 column with water (A)- acetonitrile (B) as the mobile phase for gradient elution. The analysis was performed at a flowrate of 0.8 mL/min, column temperature of 45°C and the detection wavelength was set at 210 nm.

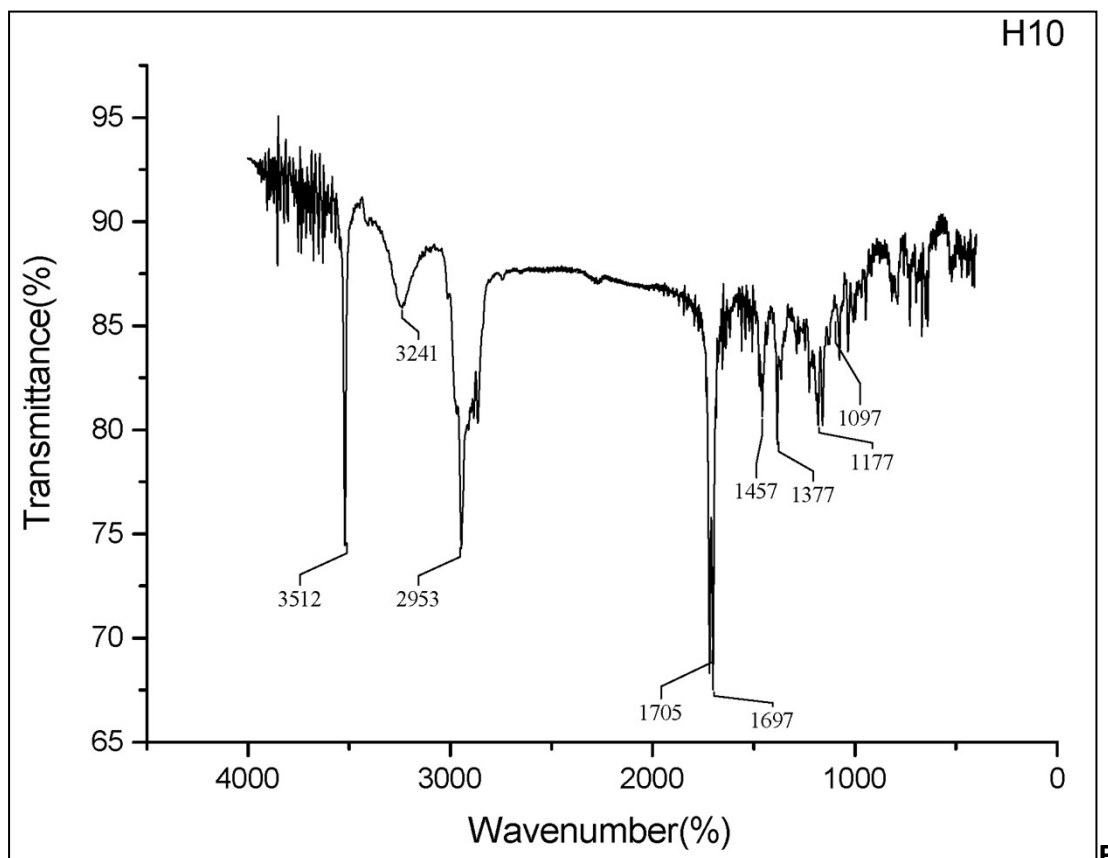

figure S27. IR spectrum of compound 4

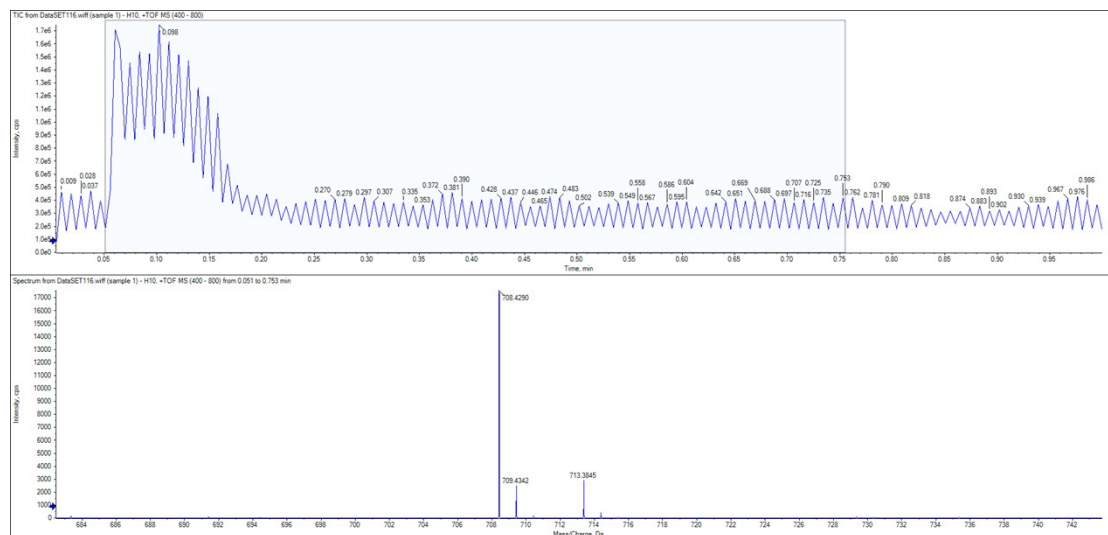

Figure S28. HR-ESI-MS spectrum of compound 4

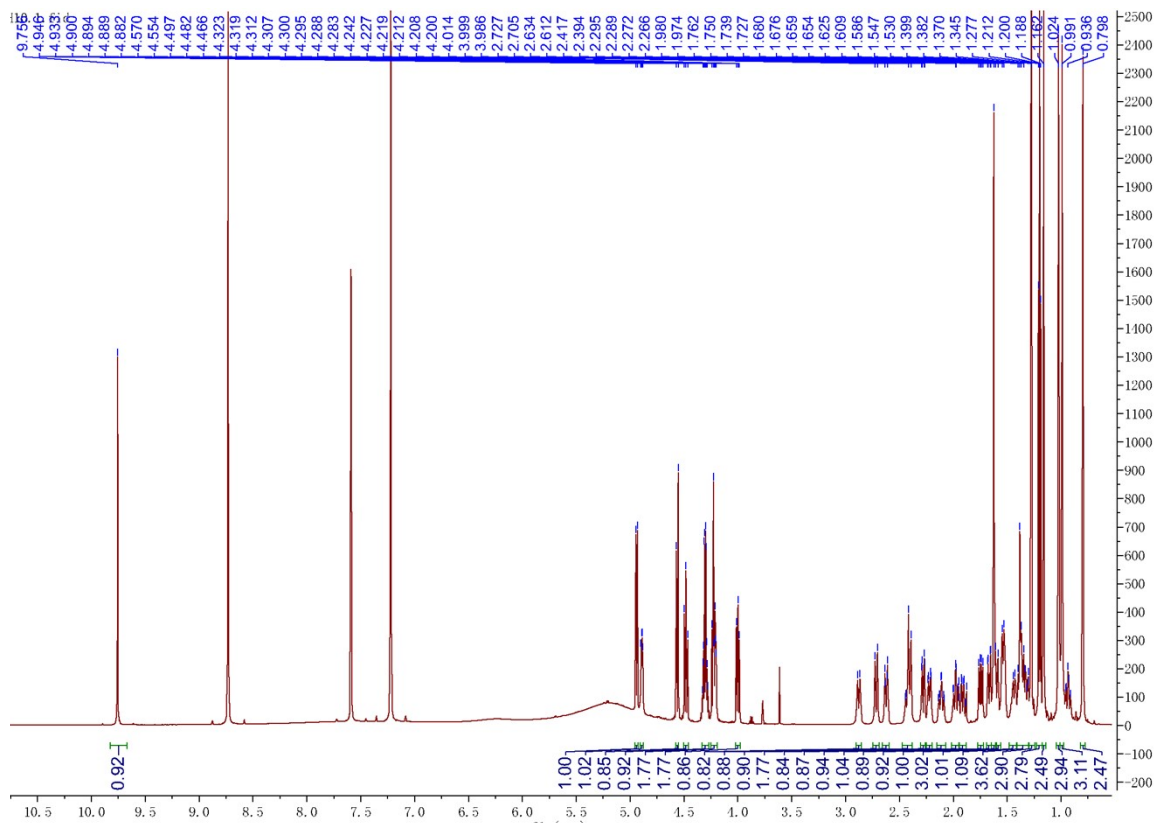

Figure S29.  $^1\text{H-NMR}$  spectrum of compound **4** in  $\text{C}_5\text{D}_5\text{N}$  (600 MHz)

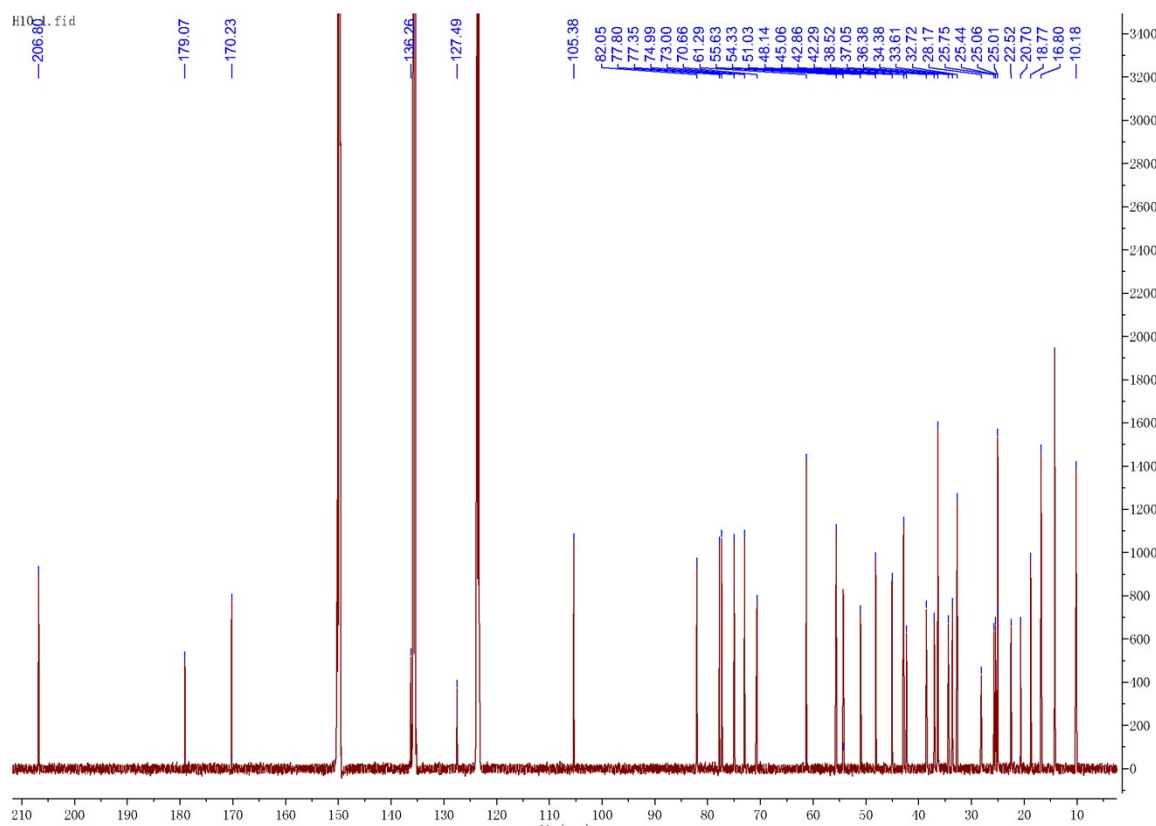

Figure S30.  $^{13}\text{C-NMR}$  spectrum of compound **4** in  $\text{C}_5\text{D}_5\text{N}$  (150 MHz)

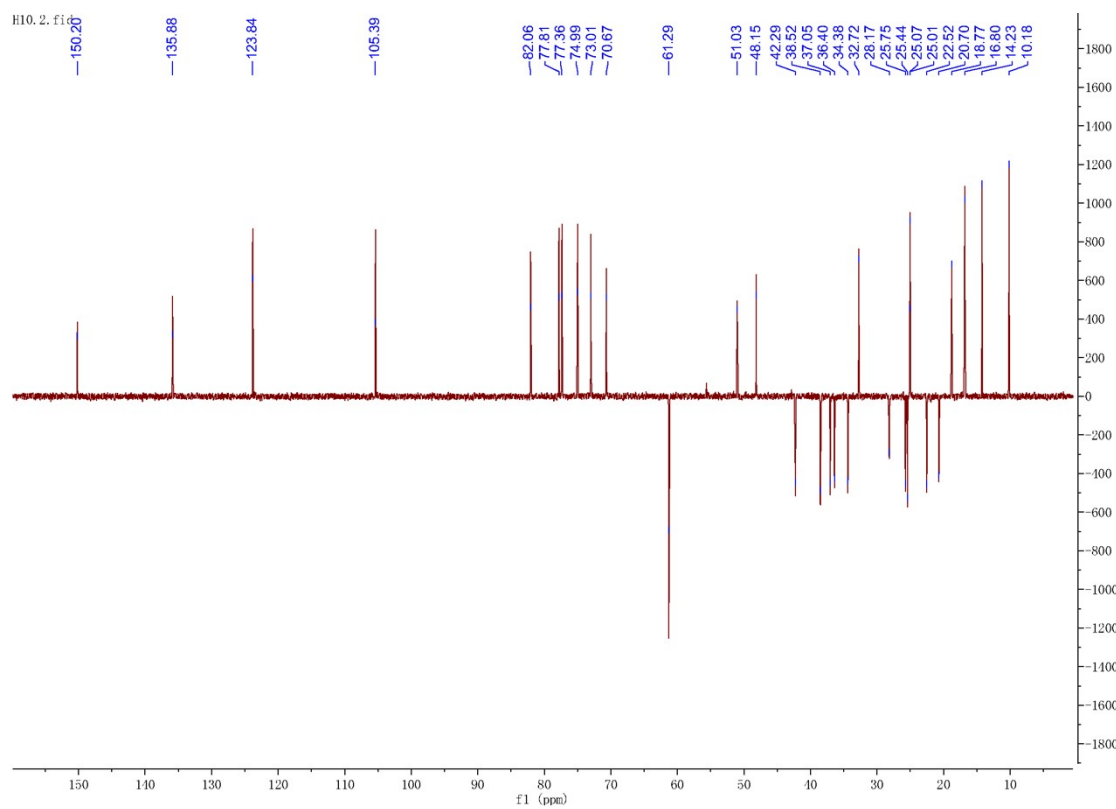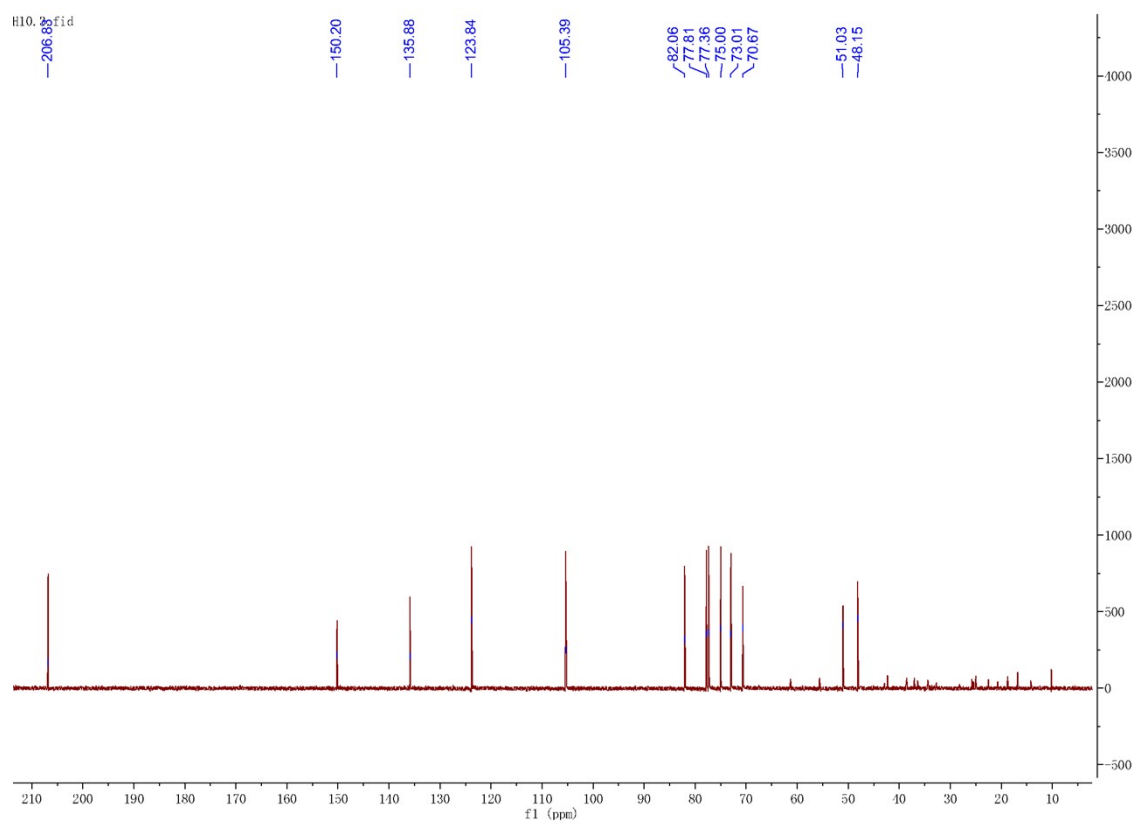

**Figure S31.** DEPT spectrum of compound **4** in  $C_5D_5N$

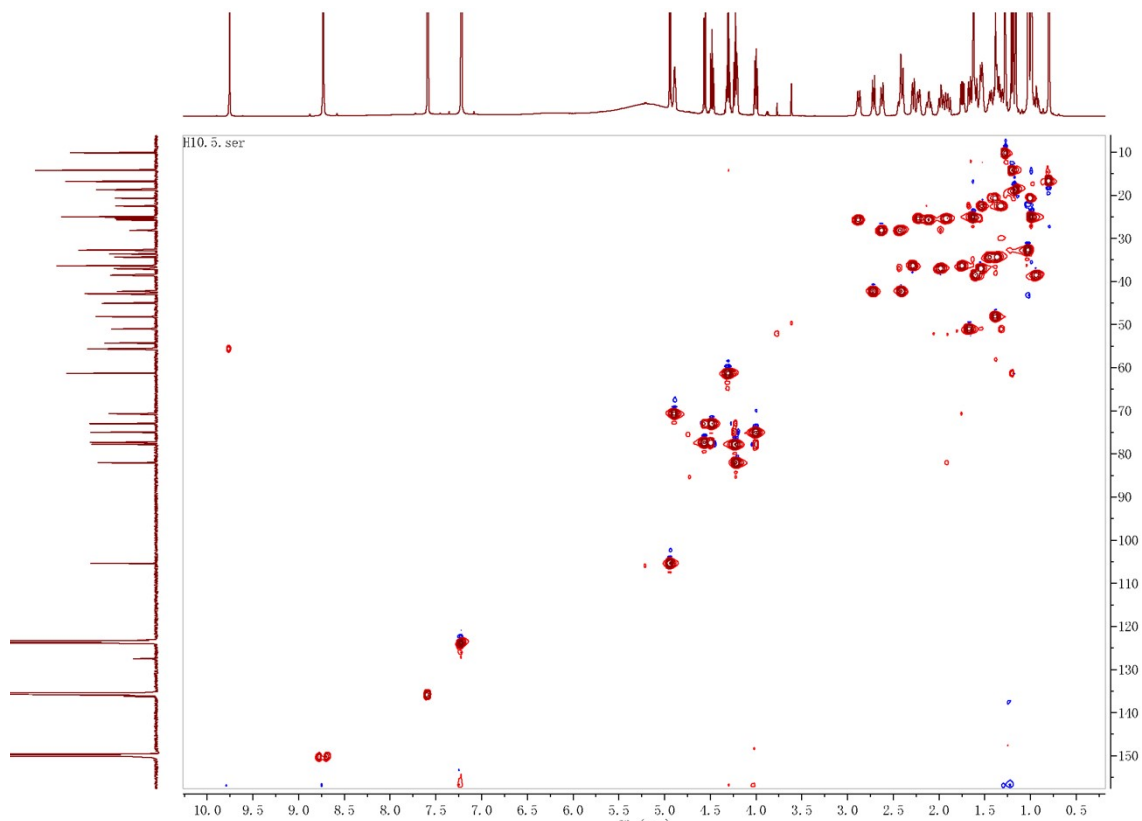

Figure S32. HSQC spectrum of compound **4** in  $C_5D_5N$

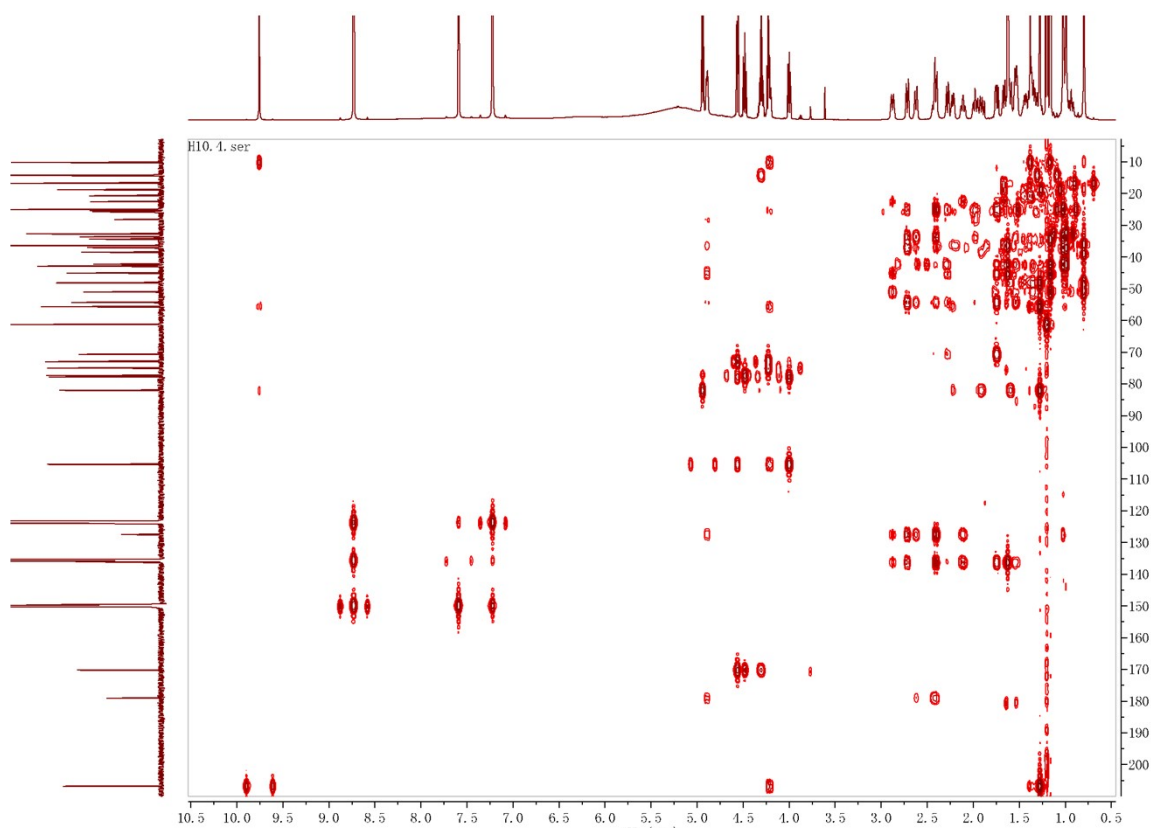

Figure S33. HMBC spectrum of compound **4** in  $C_5D_5N$

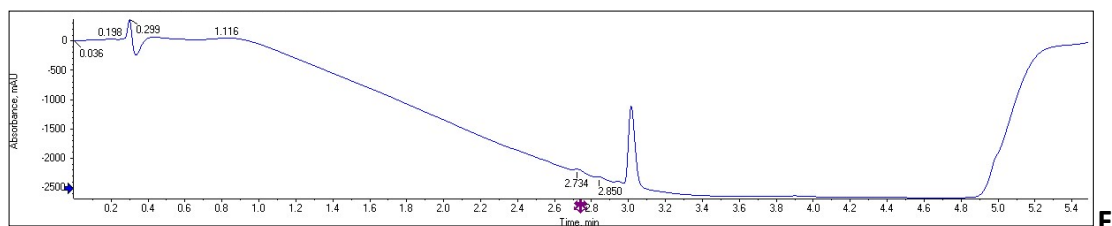

**figure S34.** HPLC spectrum of compound 5

The sample was separated on InertSustain® C18 column with water (A)- acetonitrile (B) as the mobile phase for gradient elution. The analysis was performed at a flowrate of 0.8 mL/min, column temperature of 45 °C and the detection wavelength was set at 210 nm.

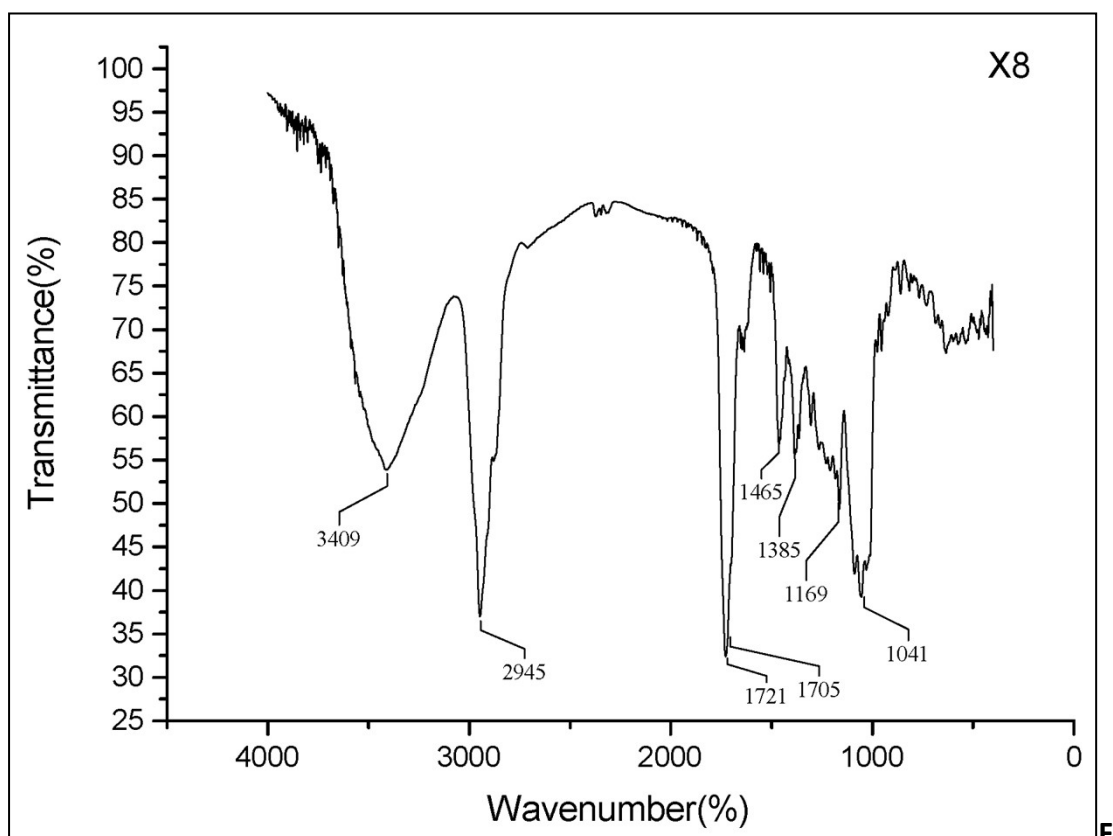

**figure S35.** IR spectrum of compound 5



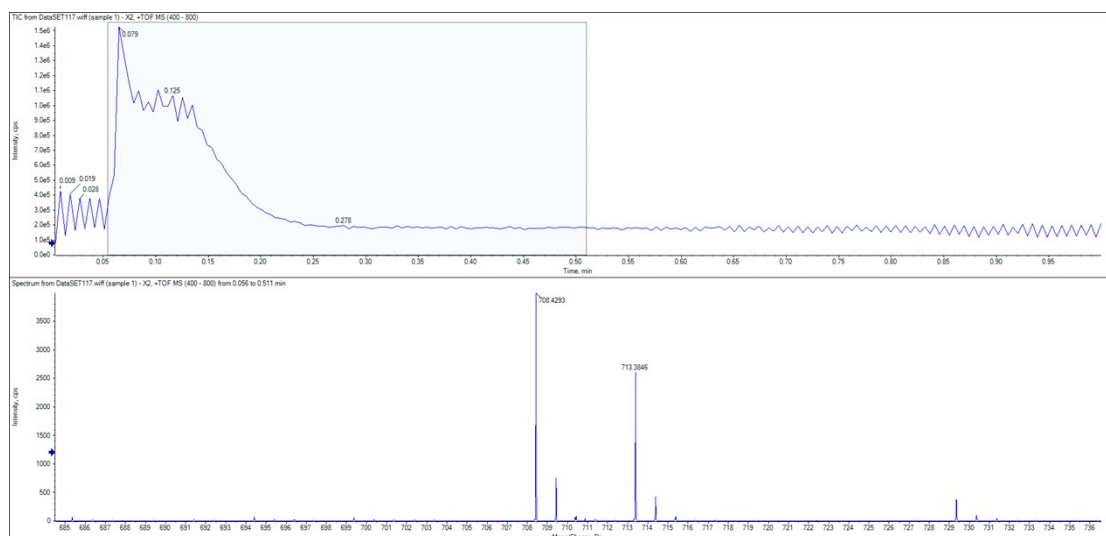

Figure S36. HR-ESI-MS spectrum of compound 5

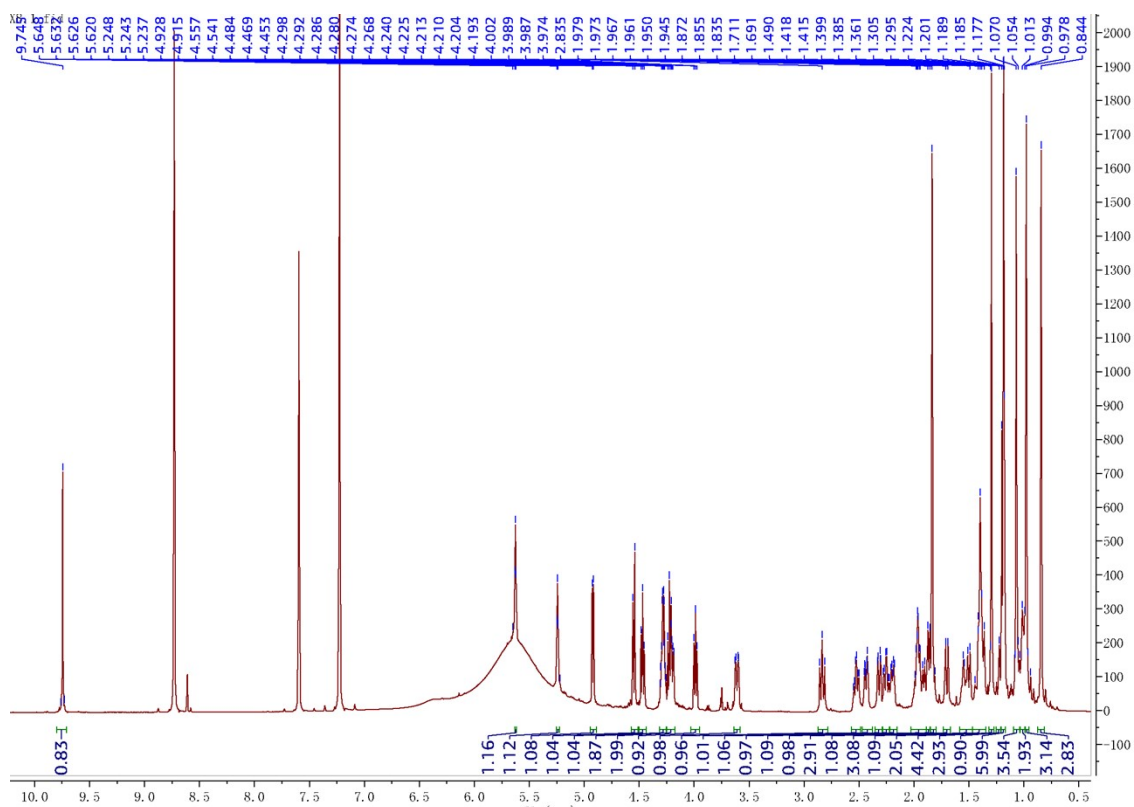

Figure S37.  $^1\text{H-NMR}$  spectrum of compound 5 in  $\text{C}_5\text{D}_5\text{N}$  (600 MHz)

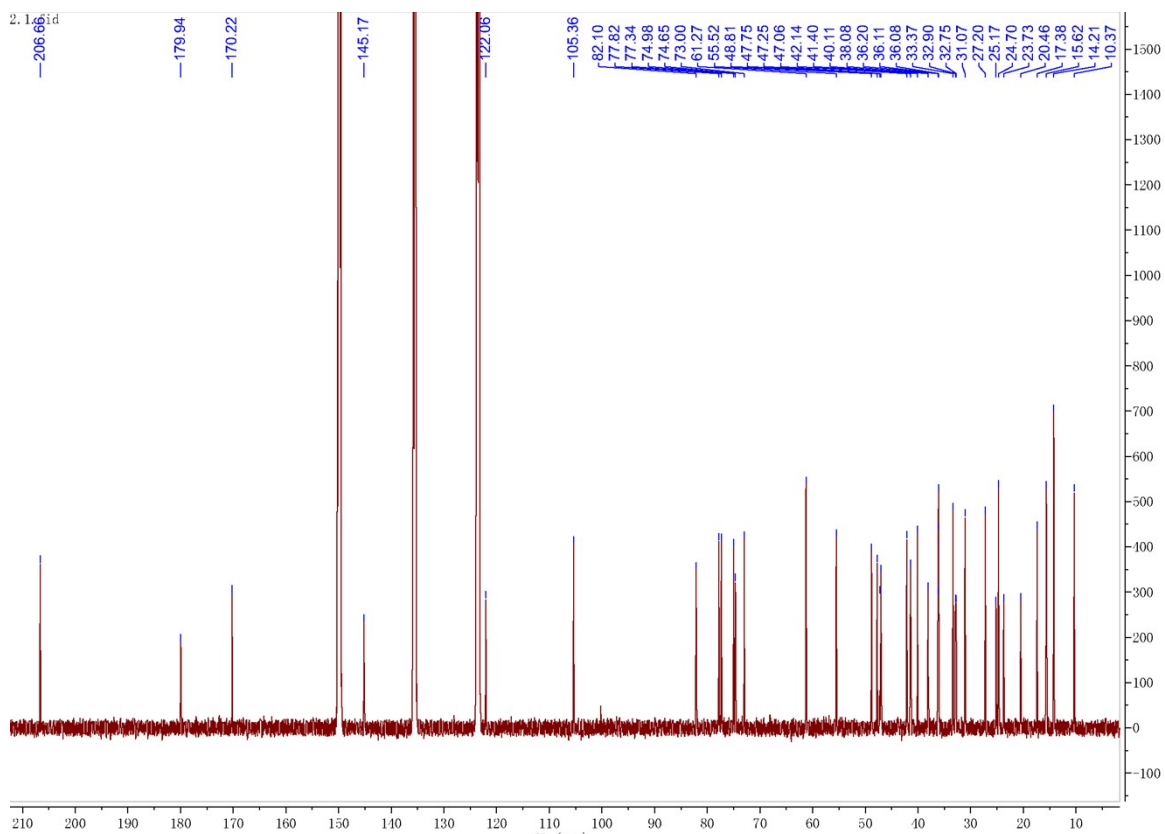

Figure S38.  $^{13}\text{C}$ -NMR spectrum of compound **5** in  $\text{C}_5\text{D}_5\text{N}$  (150 MHz)

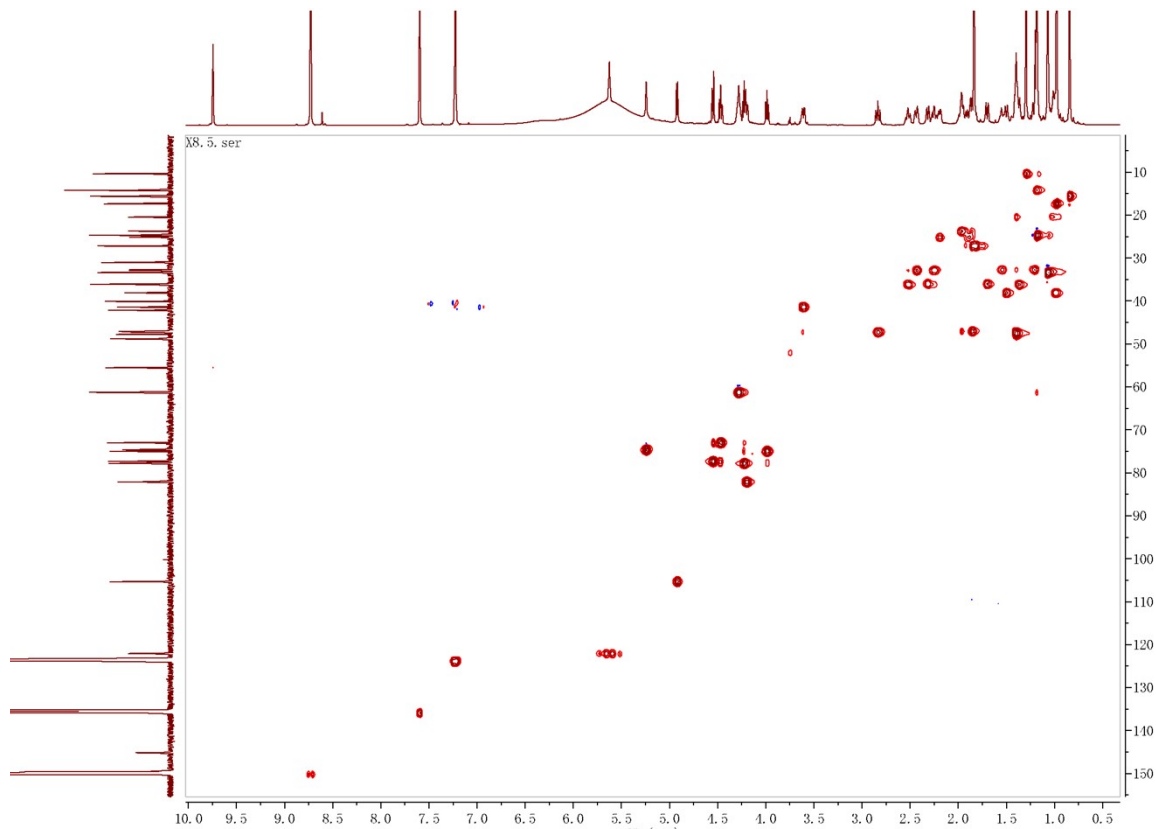

Figure S39. HSQC spectrum of compound **5** in  $\text{C}_5\text{D}_5\text{N}$

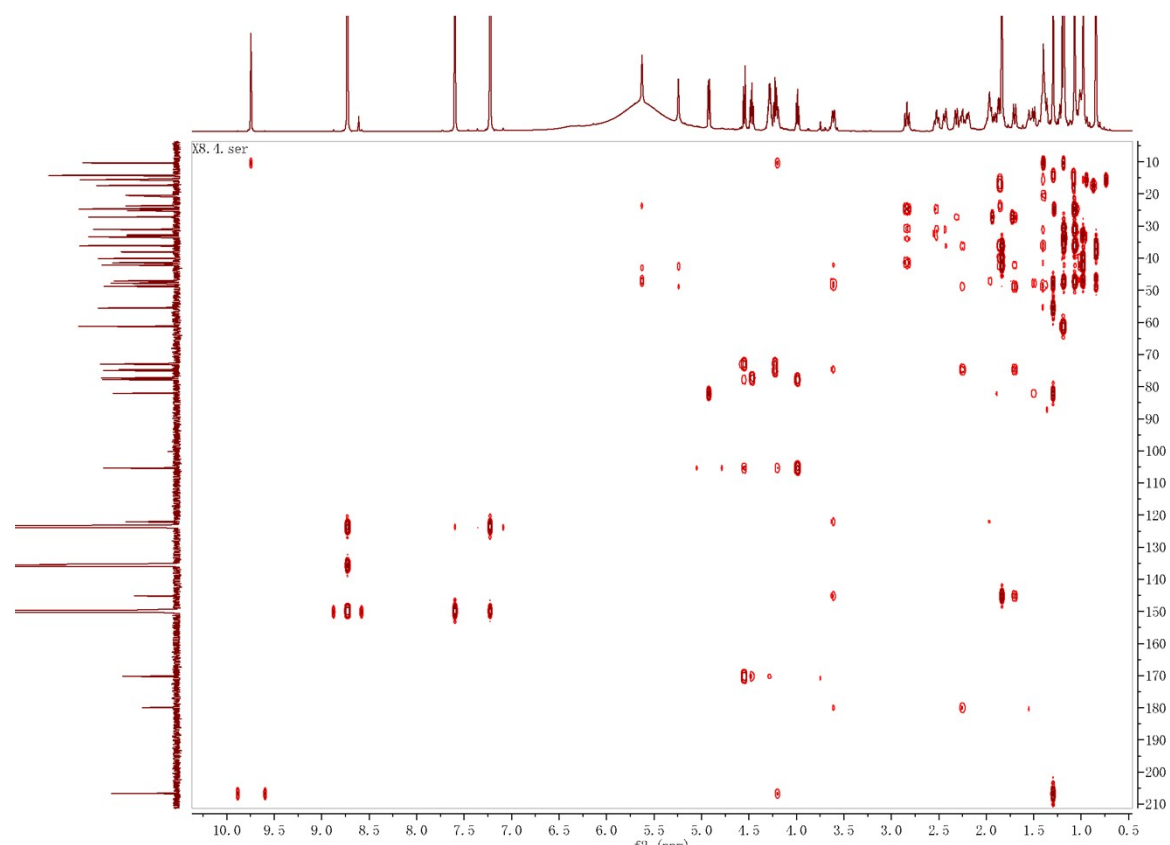

**Figure S40.** HMBC spectrum of compound **5** in  $C_5D_5N$

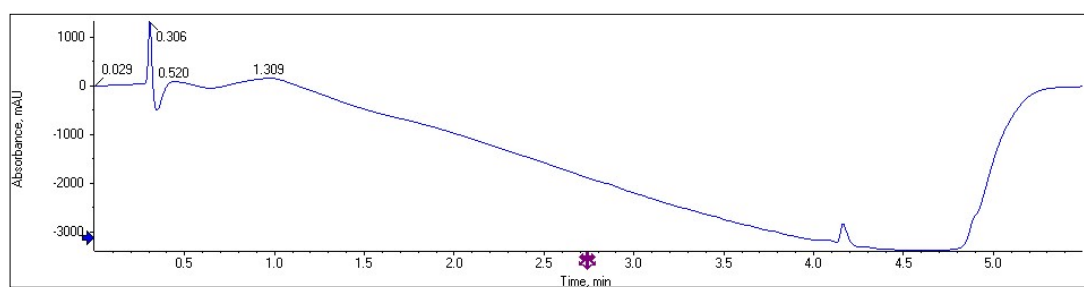

**Figure S41.** HPLC spectrum of compound **6**

The sample was separated on InertSustain® C18 column with water (A)- acetonitrile (B) as the mobile phase for gradient elution. The analysis was performed at a flowrate of 0.8 mL/min, column temperature of 45 °C and the detection wavelength was set at 210 nm.

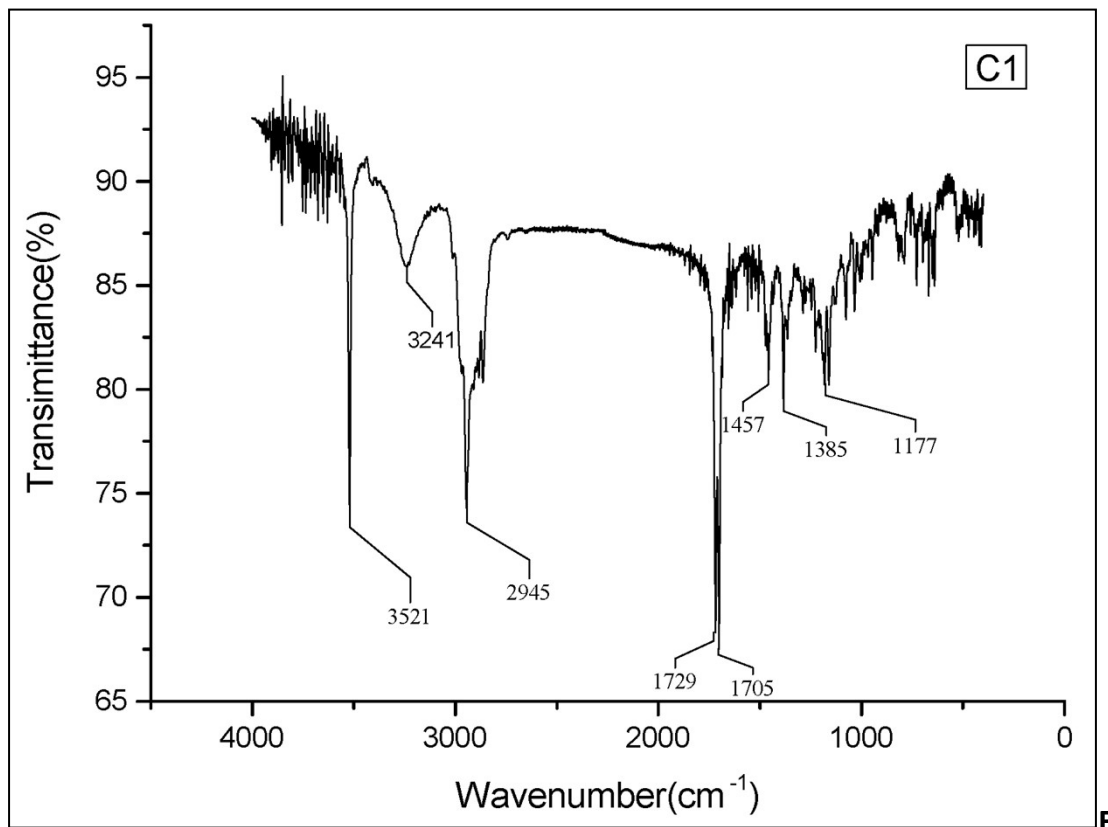

Figure S42. IR spectrum of compound 6

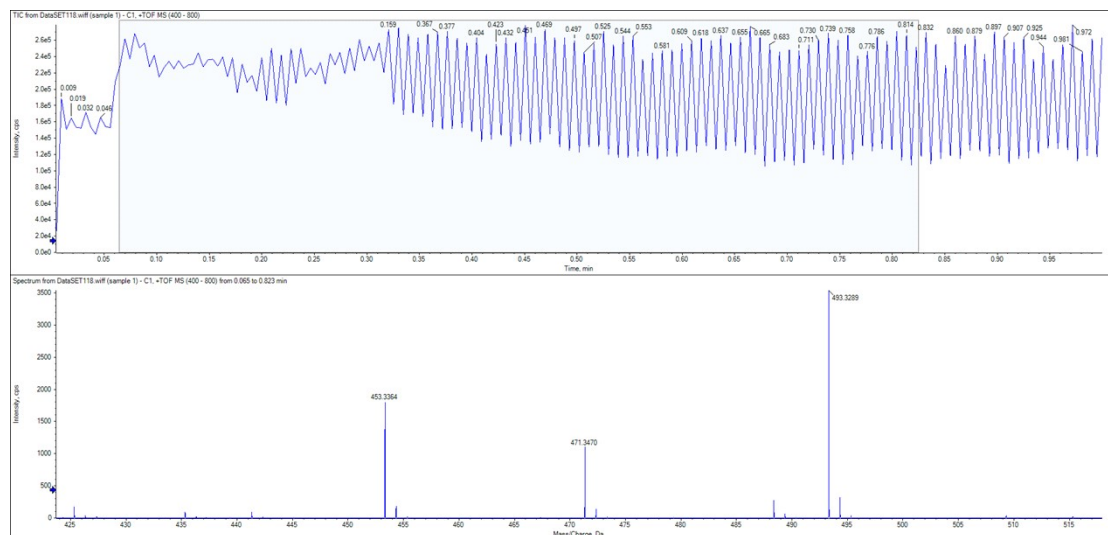

Figure S43. HR-ESI-MS spectrum of compound 6

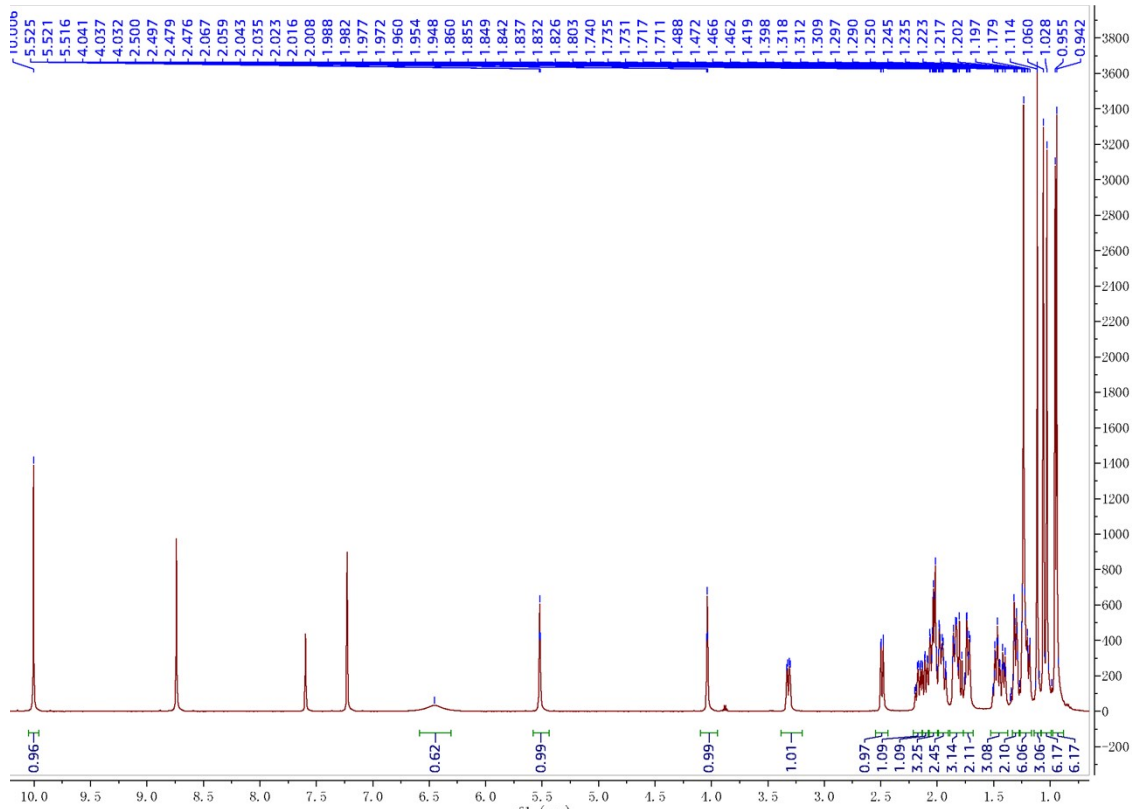

Figure S44.  $^1\text{H-NMR}$  spectrum of compound **6** in  $\text{C}_5\text{D}_5\text{N}$  (600 MHz)

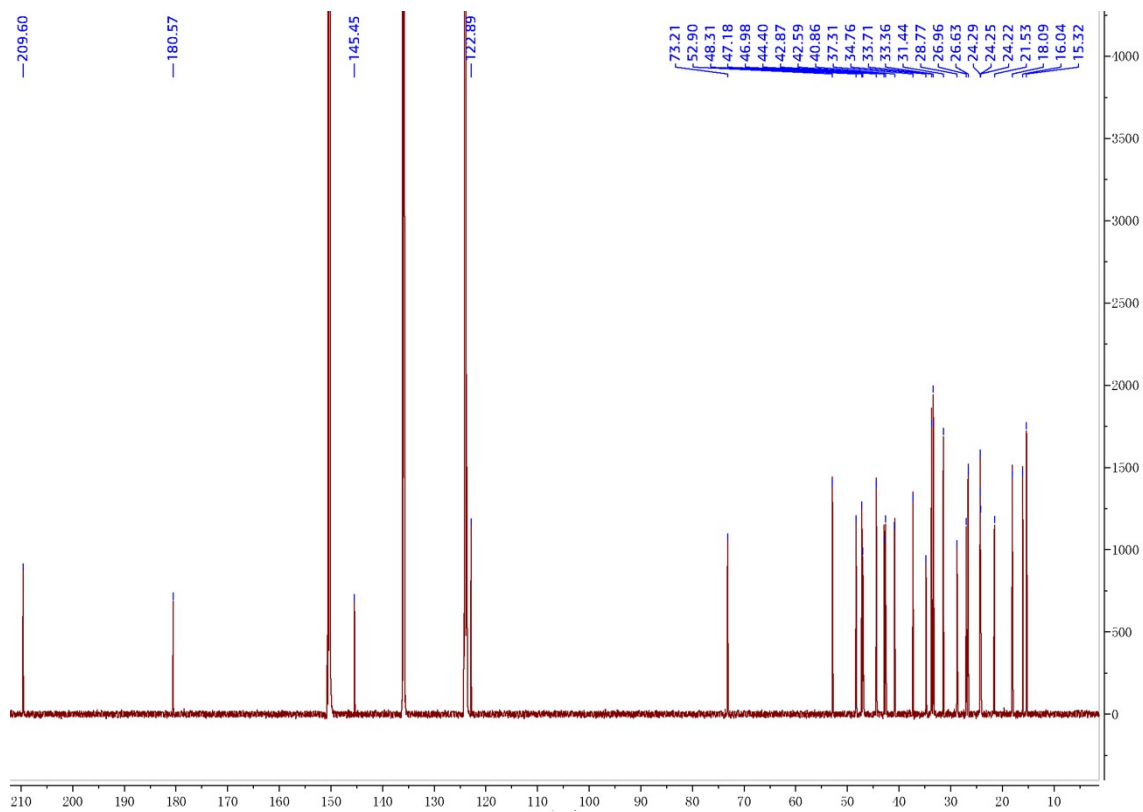

Figure S45.  $^{13}\text{C-NMR}$  spectrum of compound **6** in  $\text{C}_5\text{D}_5\text{N}$  (150 MHz)

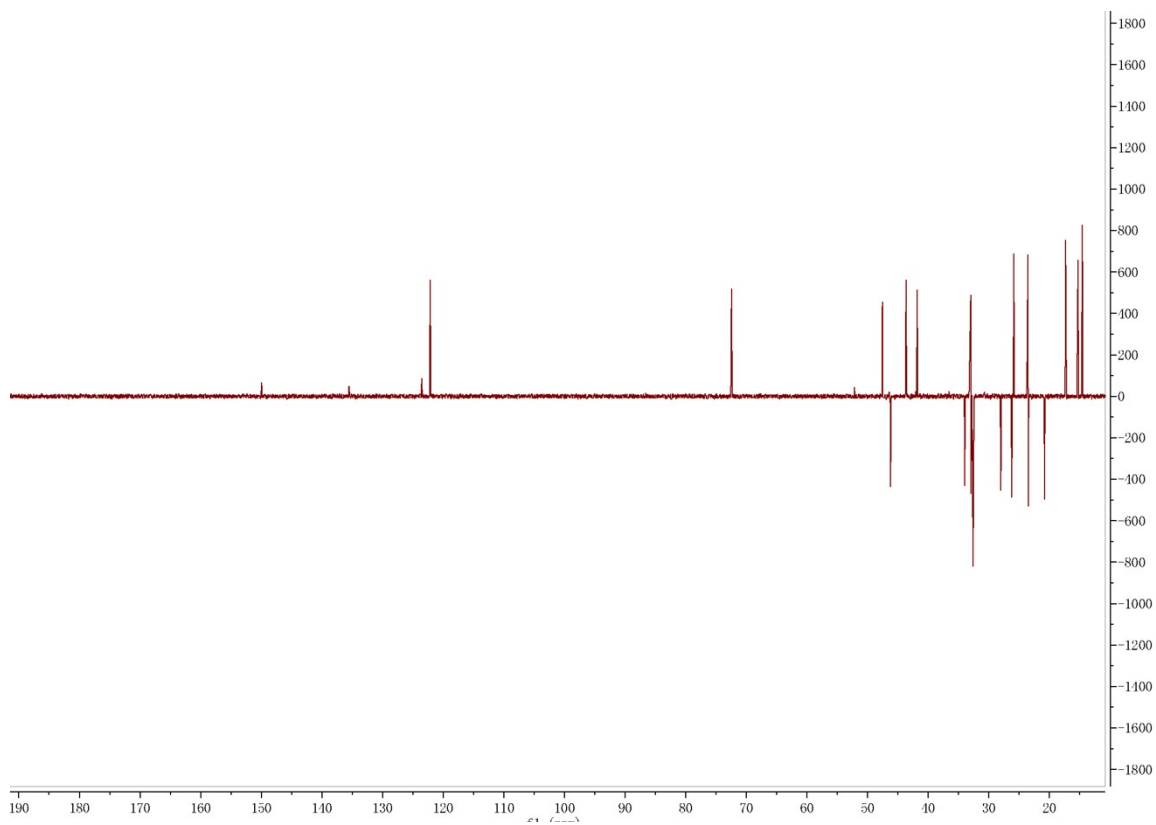

Figure S46. DEPT spectrum of compound 6 in C<sub>5</sub>D<sub>5</sub>N

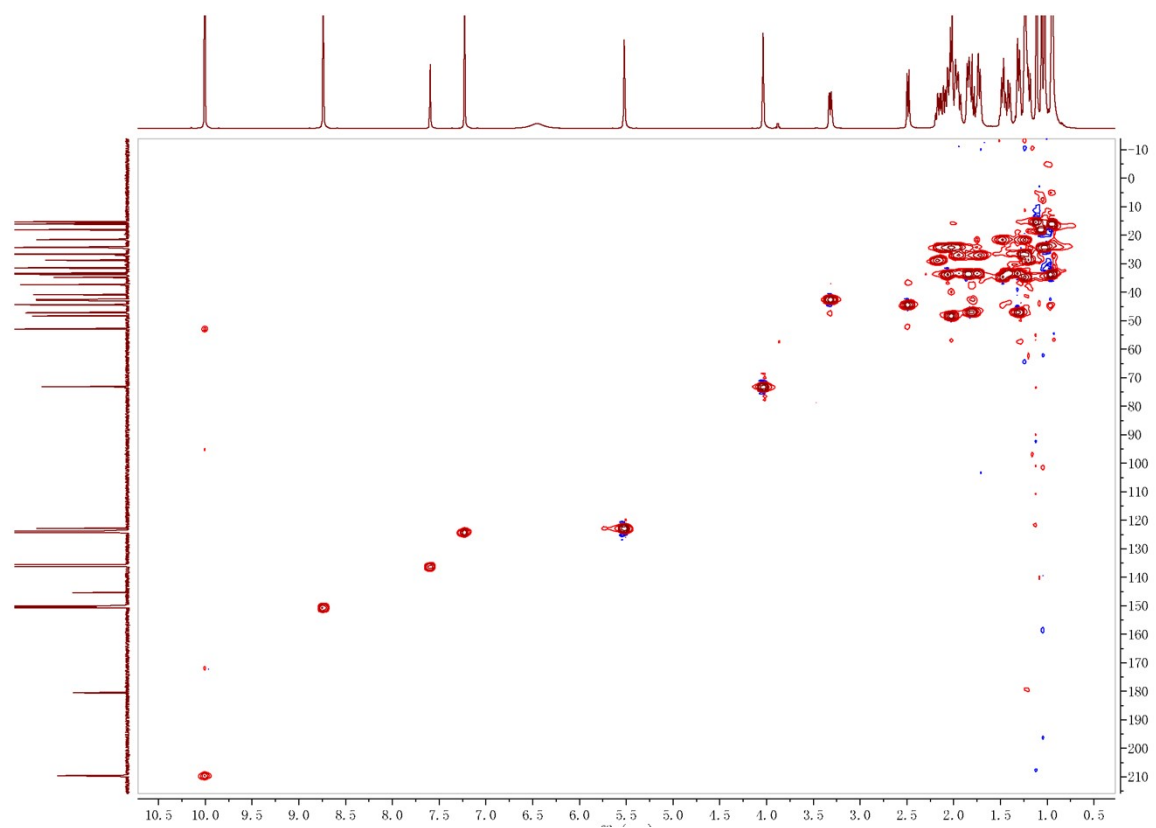

Figure S47. HSQC spectrum of compound 6 in C<sub>5</sub>D<sub>5</sub>N

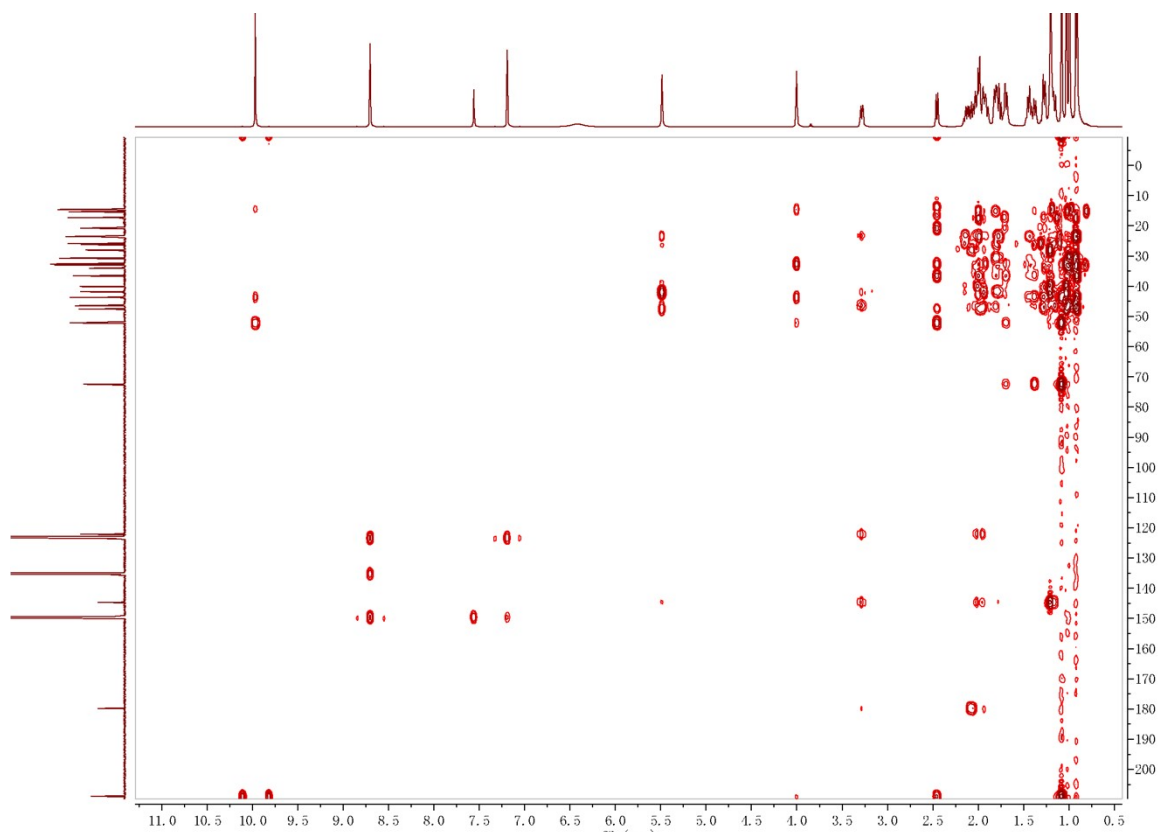

Figure S48. HMBC spectrum of compound 6 in  $C_5D_5N$

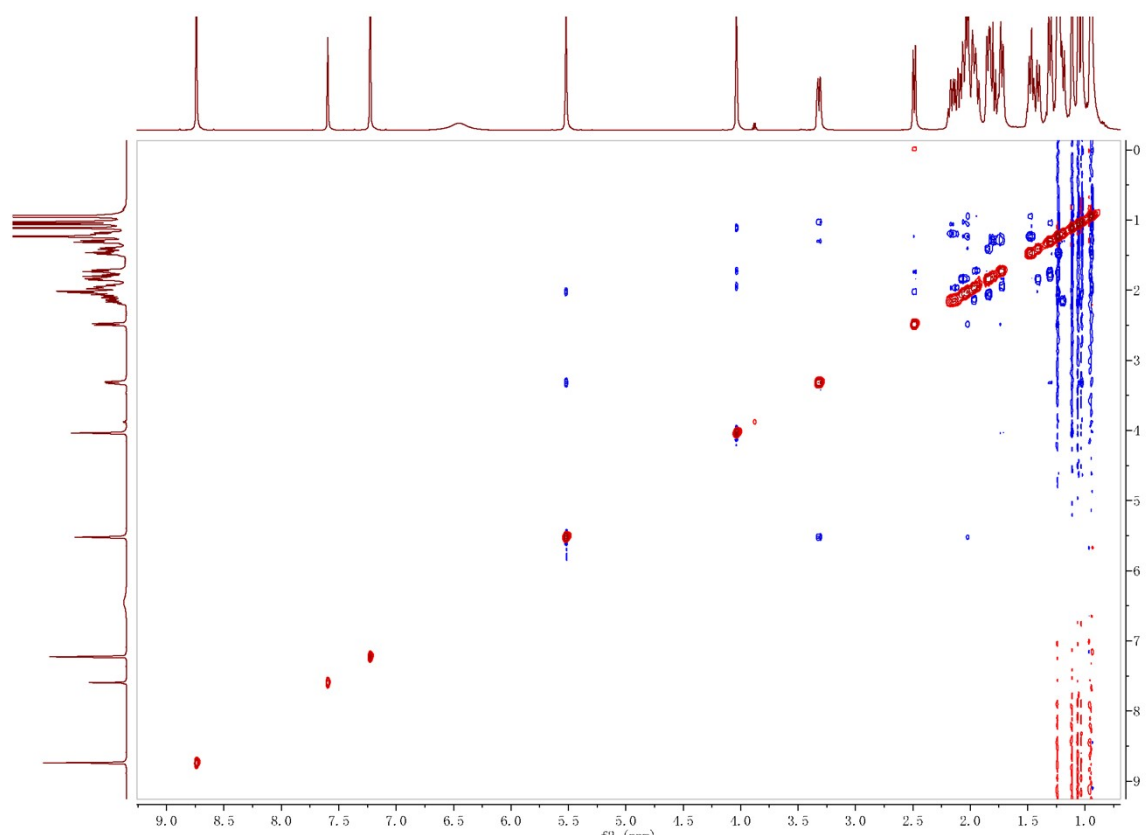

Figure S49. NOESY spectrum of compound 6 in  $C_5D_5N$

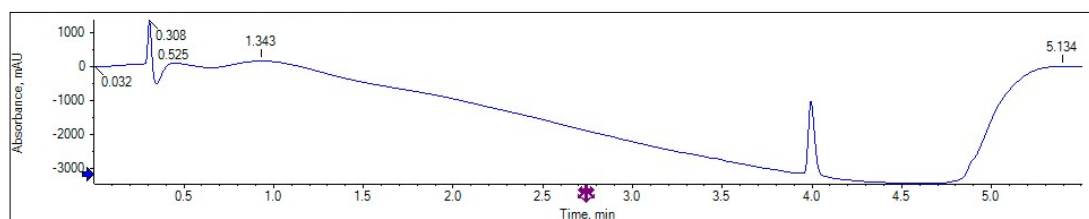

**Figure S53.** HPLC spectrum of compound **7**

The sample was separated on InertSustain® C18 column with water (A)- acetonitrile (B) as the mobile phase for gradient elution. The analysis was performed at a flowrate of 0.8 mL/min, column temperature of 45°C and the detection wavelength was set at 210 nm.

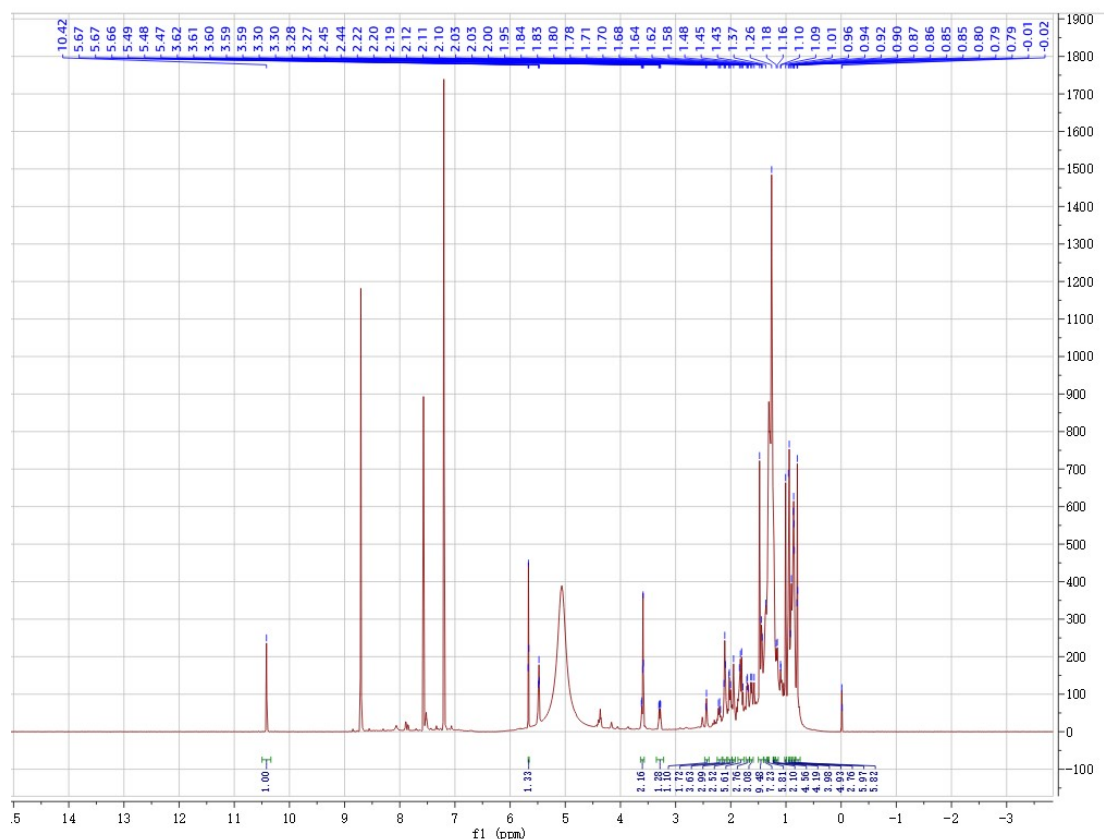

**Figure S54.**  $^1\text{H-NMR}$  spectrum of compound **7** in  $\text{C}_5\text{D}_5\text{N}$  (600 MHz)



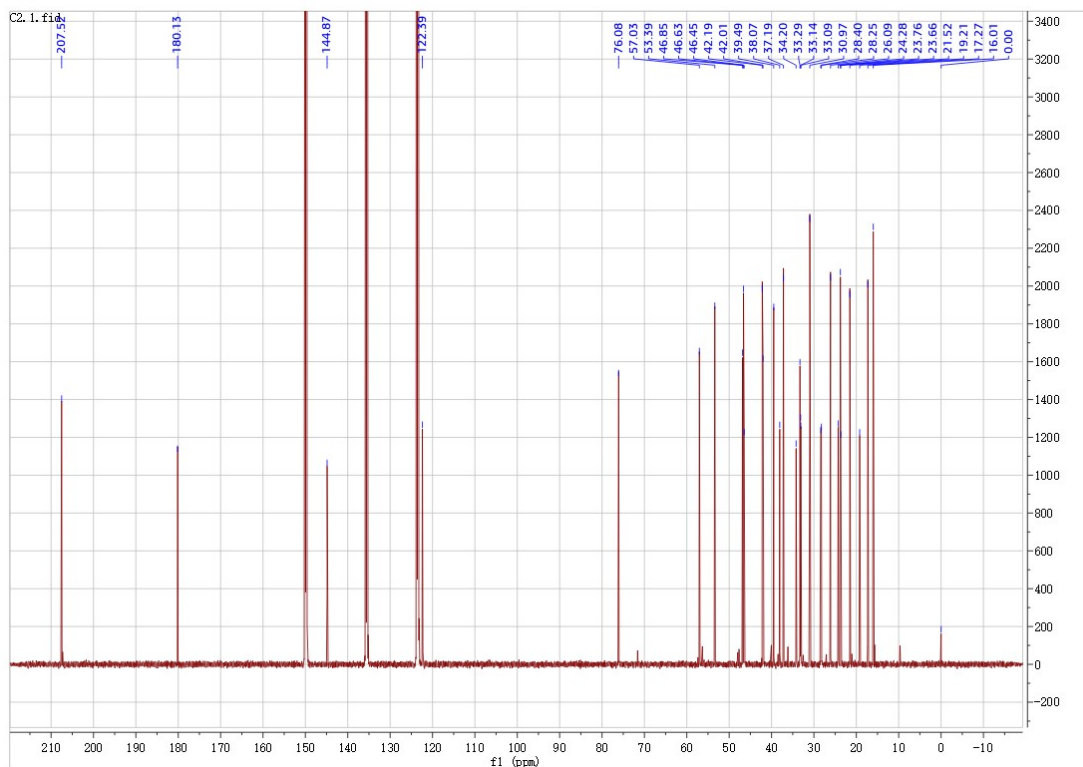

**Figure S55.**  $^{13}\text{C}$ -NMR spectrum of compound **7** in  $\text{C}_5\text{D}_5\text{N}$  (150 MHz)

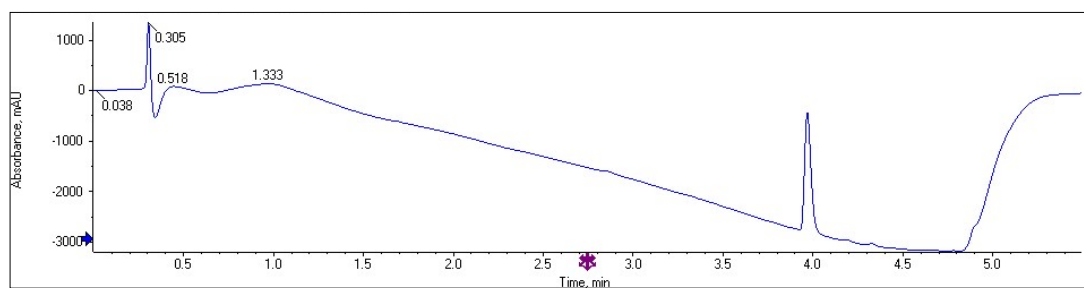

**Figure S50.** HPLC spectrum of compound **8**

The sample was separated on InertSustain® C18 column with water (A)- acetonitrile (B) as the mobile phase for gradient elution. The analysis was performed at a flowrate of 0.8 mL/min, column temperature of 45°C and the detection wavelength was set at 210 nm.

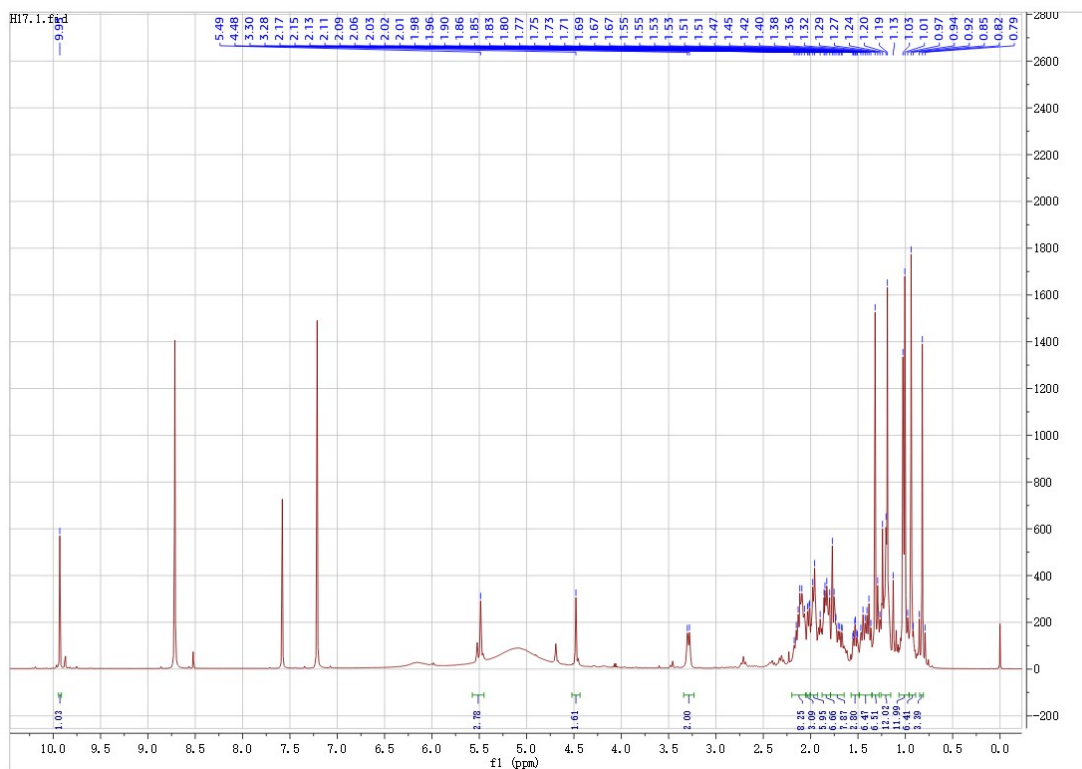

Figure S51.  $^1\text{H}$ -NMR spectrum of compound **8** in  $\text{C}_5\text{D}_5\text{N}$  (600 MHz)

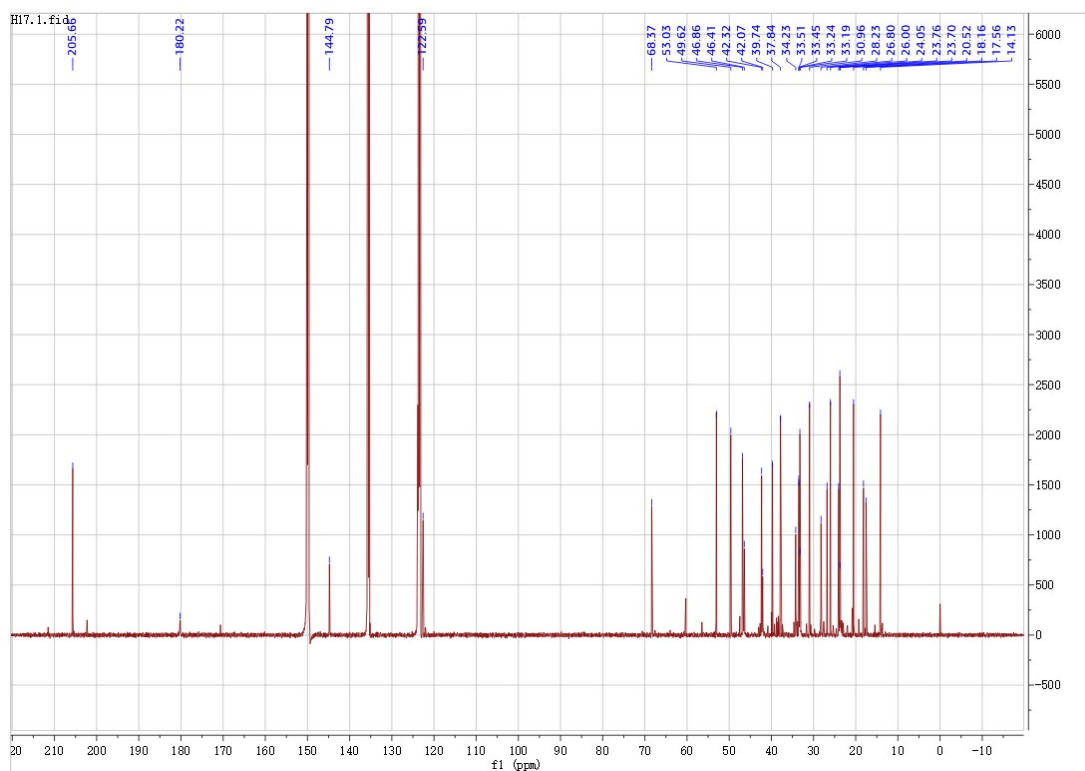

Figure S52.  $^{13}\text{C}$ -NMR spectrum of compound **8** in  $\text{C}_5\text{D}_5\text{N}$  (150 MHz)

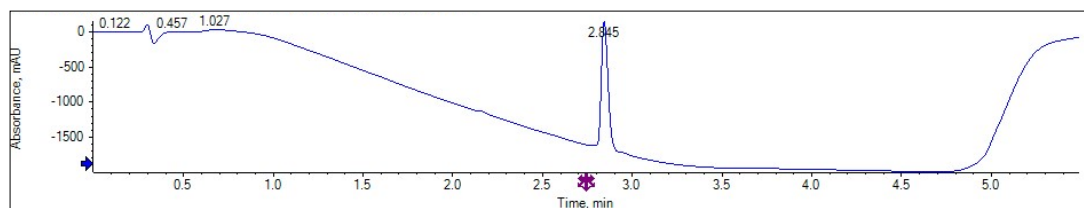

**Figure S56.** HPLC spectrum of compound **9**

The sample was separated on InertSustain® C18 column with water (A)- acetonitrile (B) as the mobile phase for gradient elution. The analysis was performed at a flowrate of 0.8 mL/min, column temperature of 45°C and the detection wavelength was set at 210 nm.

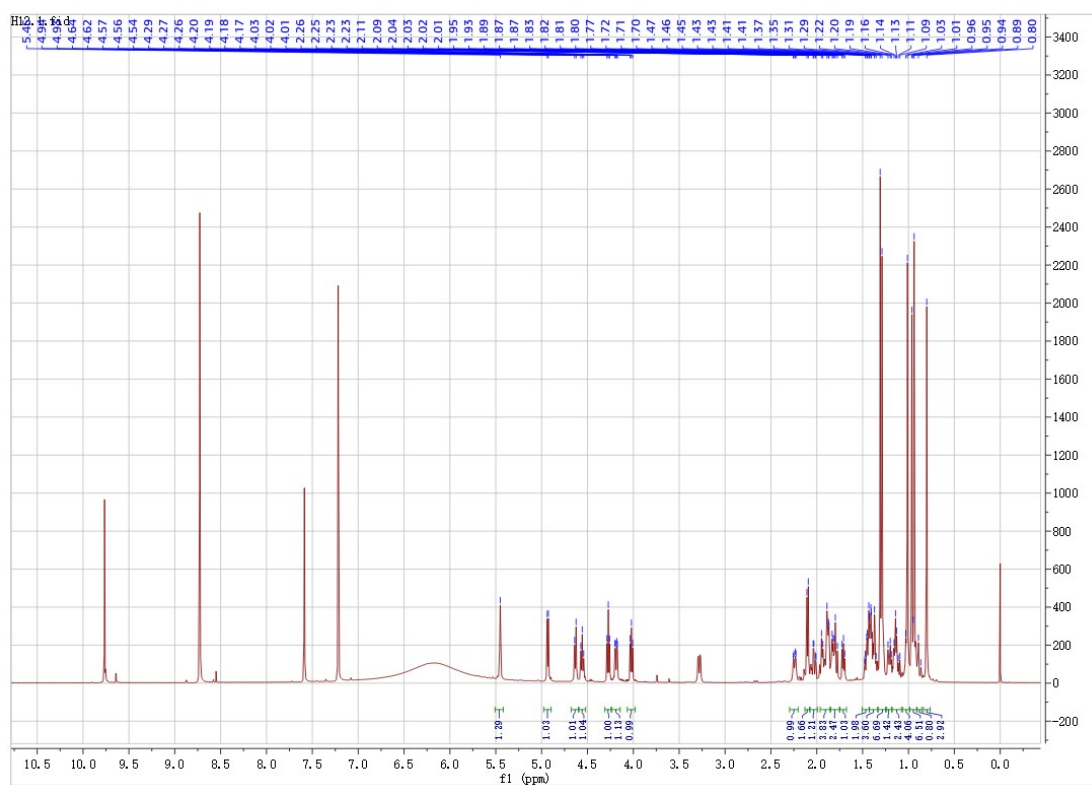

**Figure S57.**  $^1\text{H-NMR}$  spectrum of compound **9** in  $\text{C}_5\text{D}_5\text{N}$  (600 MHz)

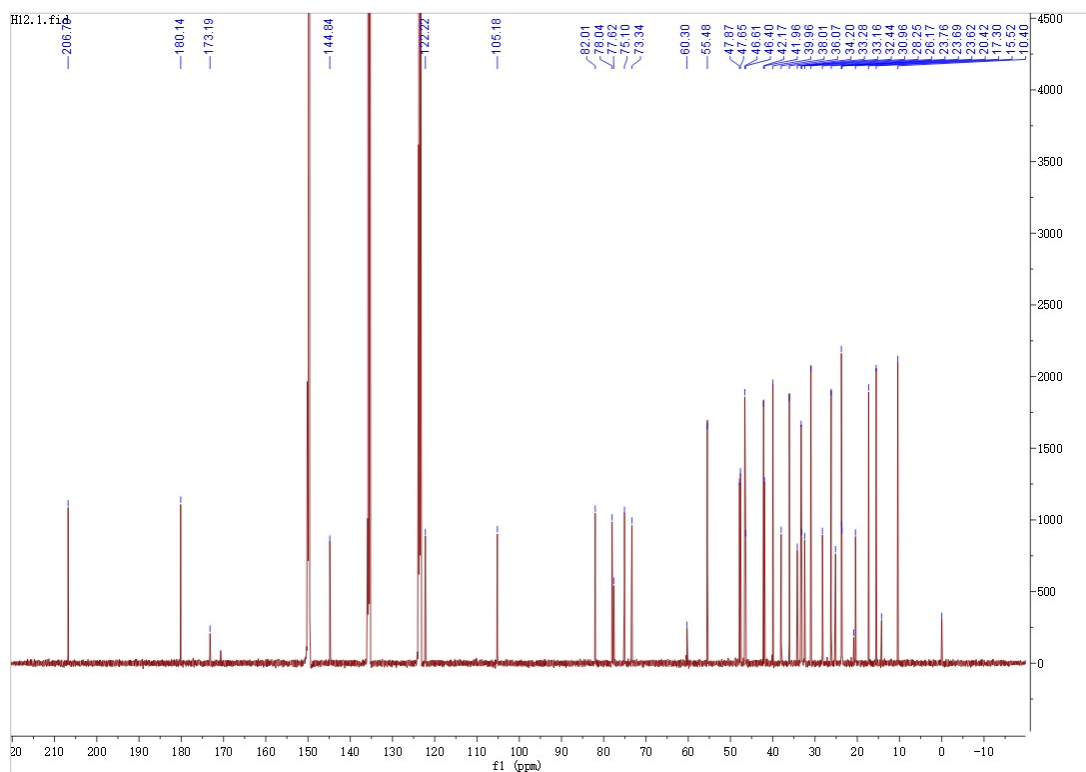

**Figure S58.**  $^{13}\text{C}$ -NMR spectrum of compound **9** in  $\text{C}_5\text{D}_5\text{N}$  (150 MHz)

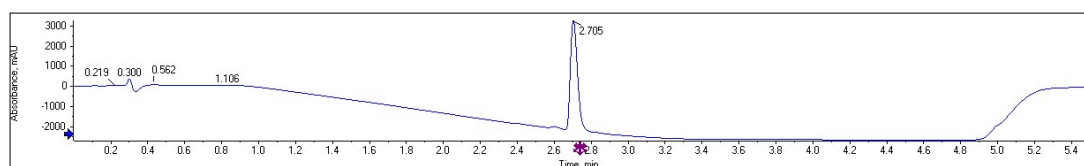

**Figure S59.** HPLC spectrum of compound **10**

The sample was separated on InertSustain<sup>®</sup> C18 column with water (A)- acetonitrile (B) as the mobile phase for gradient elution. The analysis was performed at a flowrate of 0.8 mL/min, column temperature of 45 °C and the detection wavelength was set at 210 nm.

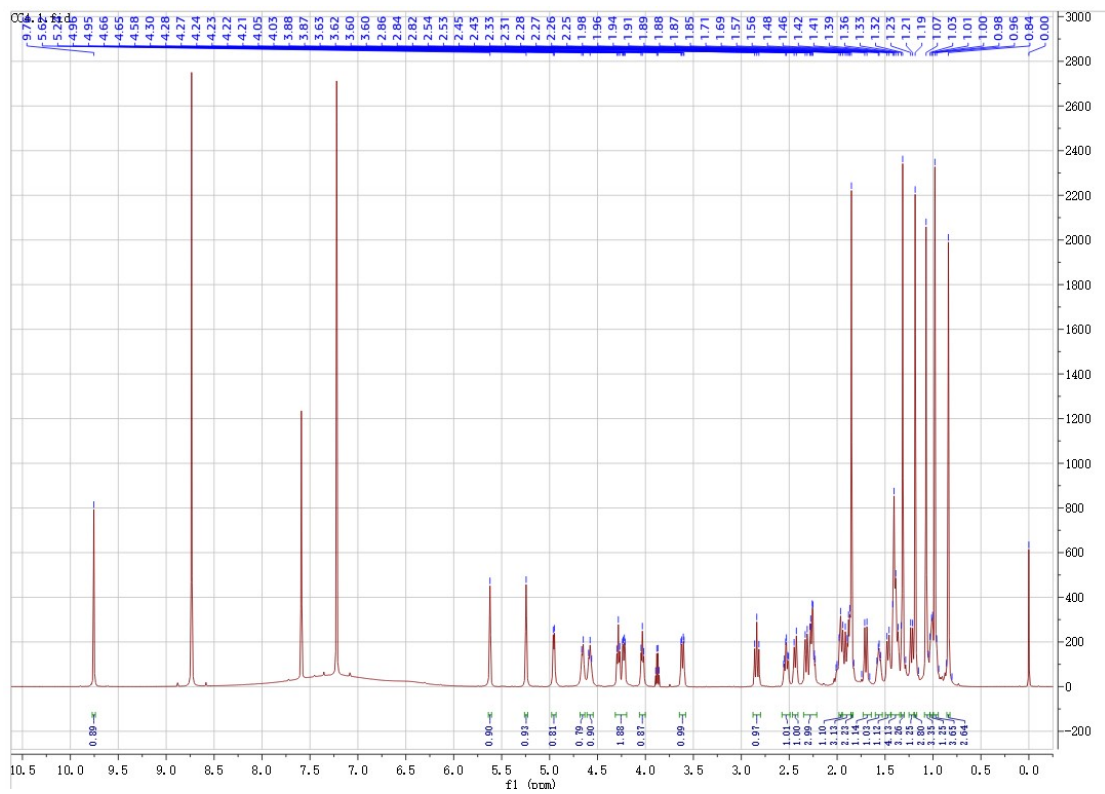

Figure S60.  $^1\text{H}$ -NMR spectrum of compound **10** in  $\text{C}_5\text{D}_5\text{N}$  (600 MHz)

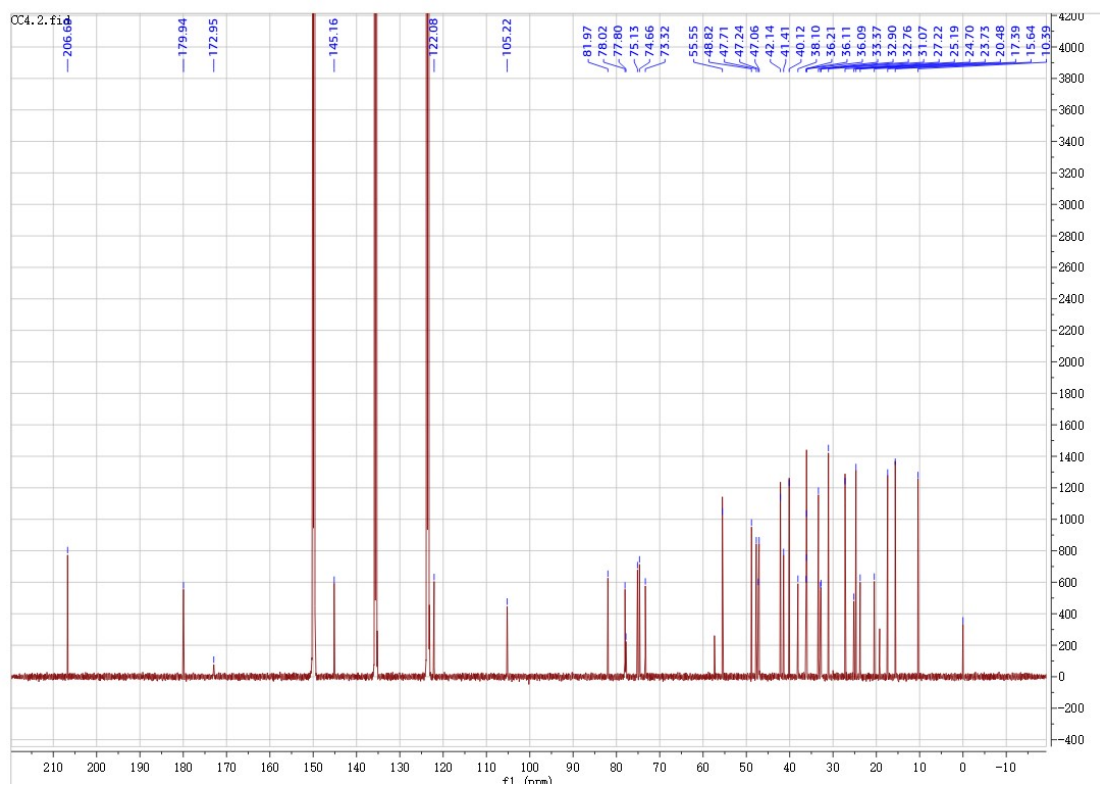

Figure S61.  $^{13}\text{C}$ -NMR spectrum of compound **10** in  $\text{C}_5\text{D}_5\text{N}$  (150 MHz)

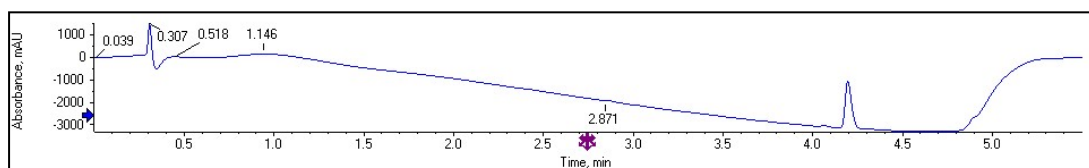

**Figure S62.** HPLC spectrum of compound **11**

The sample was separated on InertSustain® C18 column with water (A)- acetonitrile (B) as the mobile phase for gradient elution. The analysis was performed at a flowrate of 0.8 mL/min, column temperature of 45 °C and the detection wavelength was set at 210 nm.

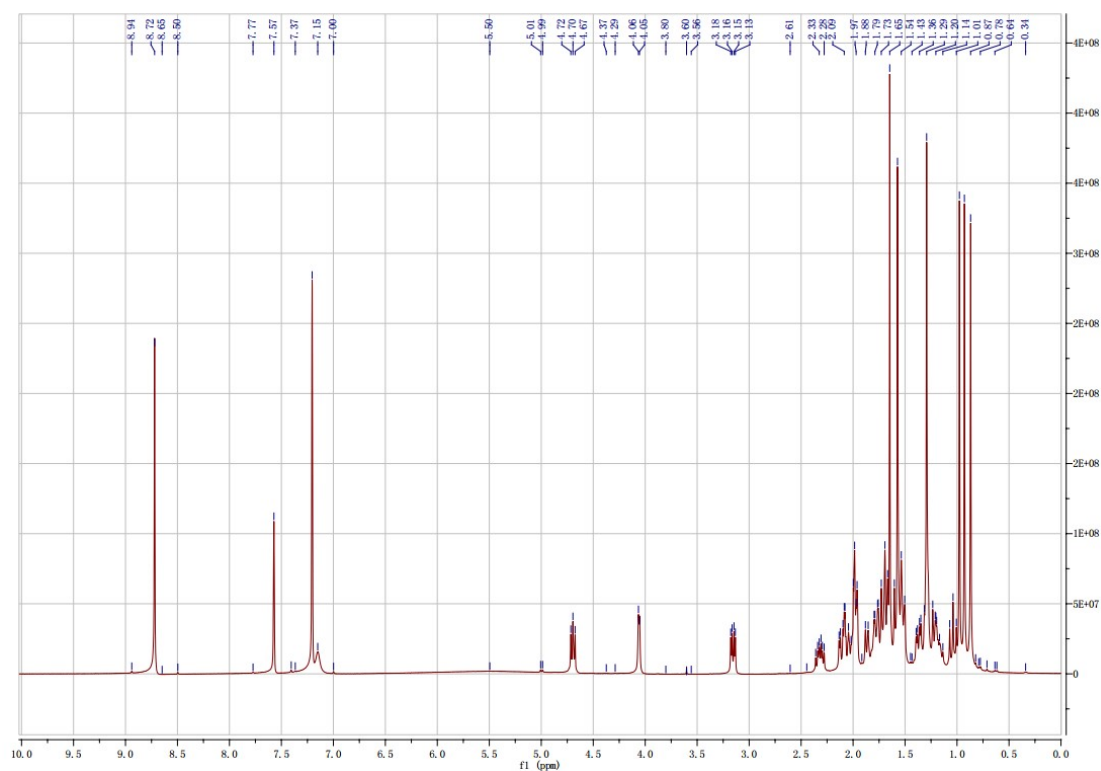

**Figure S63.**  $^1\text{H-NMR}$  spectrum of compound **11** in  $\text{C}_5\text{D}_5\text{N}$  (600 MHz)

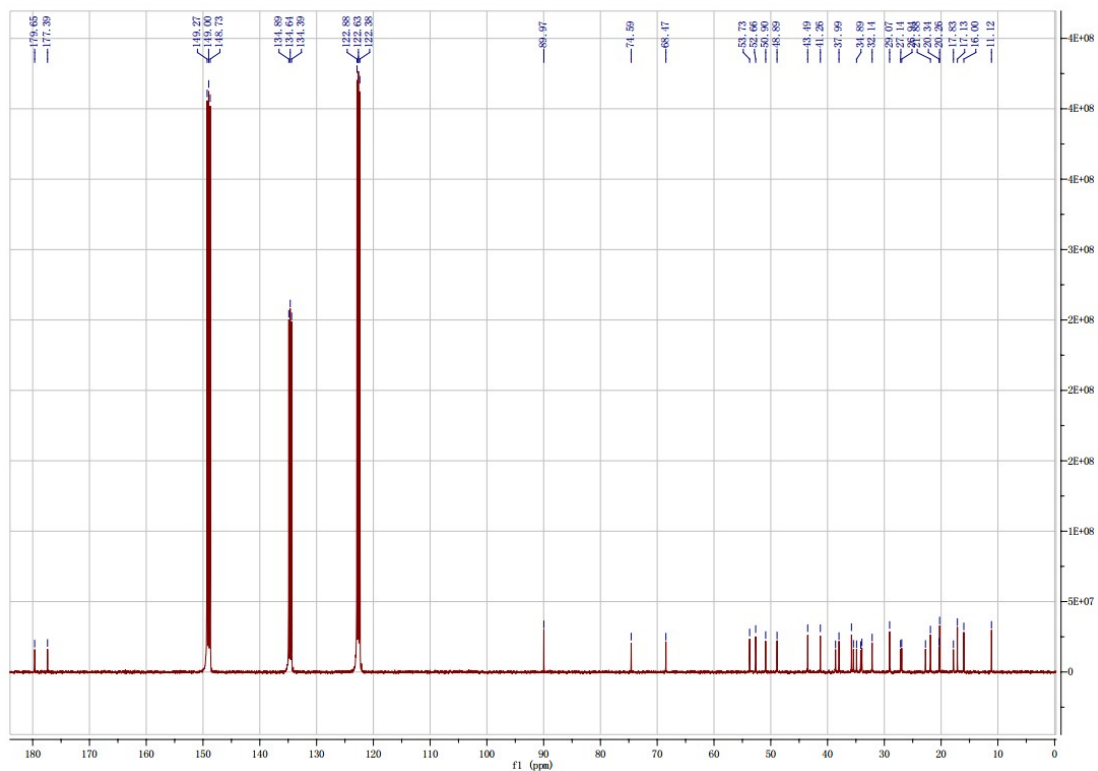

**Figure S64.**  $^{13}\text{C}$ -NMR spectrum of compound **11** in  $\text{C}_5\text{D}_5\text{N}$  (150 MHz)

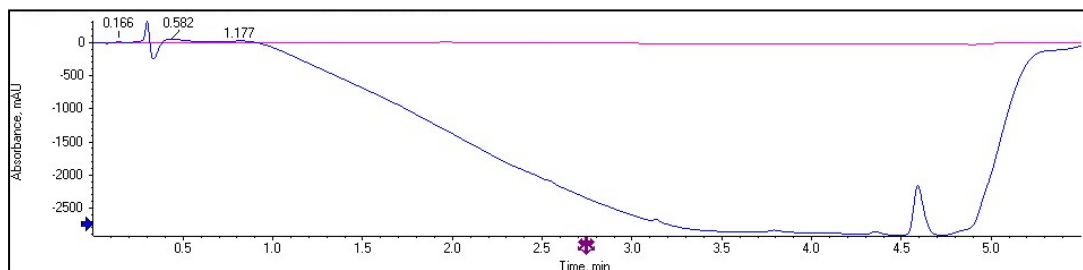

**Figure S65.** HPLC spectrum of compound **12**

The sample was separated on InertSustain® C18 column with water (A)- acetonitrile (B) as the mobile phase for gradient elution. The analysis was performed at a flowrate of 0.8 mL/min, column temperature of 45°C and the detection wavelength was set at 210 nm and 254nm.

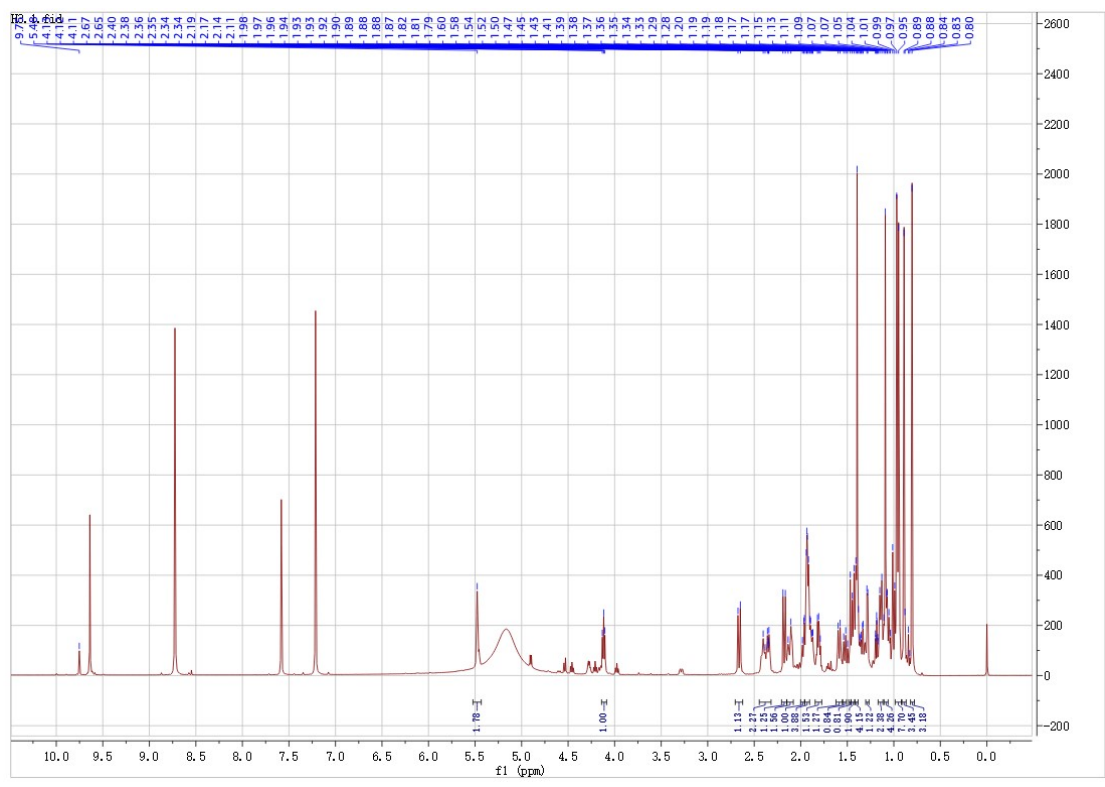

Figure S66. <sup>1</sup>H-NMR spectrum of compound **12** in C<sub>5</sub>D<sub>5</sub>N (600 MHz)

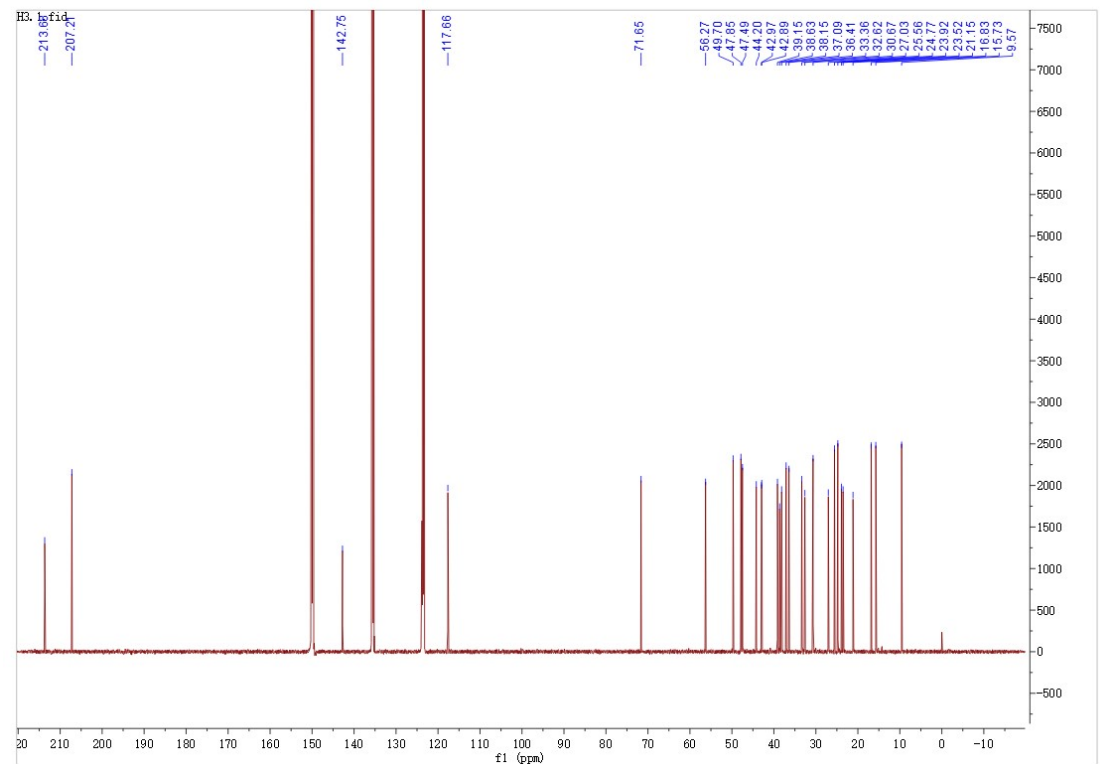

Figure S67. <sup>13</sup>C-NMR spectrum of compound **12** in C<sub>5</sub>D<sub>5</sub>N (150 MHz)
